# Supplementary material for: Eichhornia crassipes (Mart.) Solms: A Comprehensive Review of Its Chemical Composition, Traditional Use, and Value-Added Products
Source: Frontiers journal article supplement (doi:10.3389/fphar.2022.842511), 2022-03-18
Supplement: Data_Sheet_1.PDF [file Data_Sheet_1.PDF]

## *Supplementary Material*

### ***Eichhornia crassipes* Mart.: A comprehensive review of its chemical composition, traditional use, and value-added products**

Widad Ben Bakrim <sup>1,2</sup>, Amine Ezzariai <sup>1</sup>, Fadoua Karouach <sup>1</sup>, Mansour Sobeh <sup>2</sup>, Mulugeta Kibret <sup>1,3</sup>, Mohamed Hafidi <sup>2,4</sup>  
\*, Lamfeddal Kouisni <sup>1</sup>, Abdelaziz Yasri <sup>2,5</sup>

**\* Correspondence: Mohamed Hafidi**  
**[hafidi@uca.ac.ma](mailto:hafidi@uca.ac.ma)**

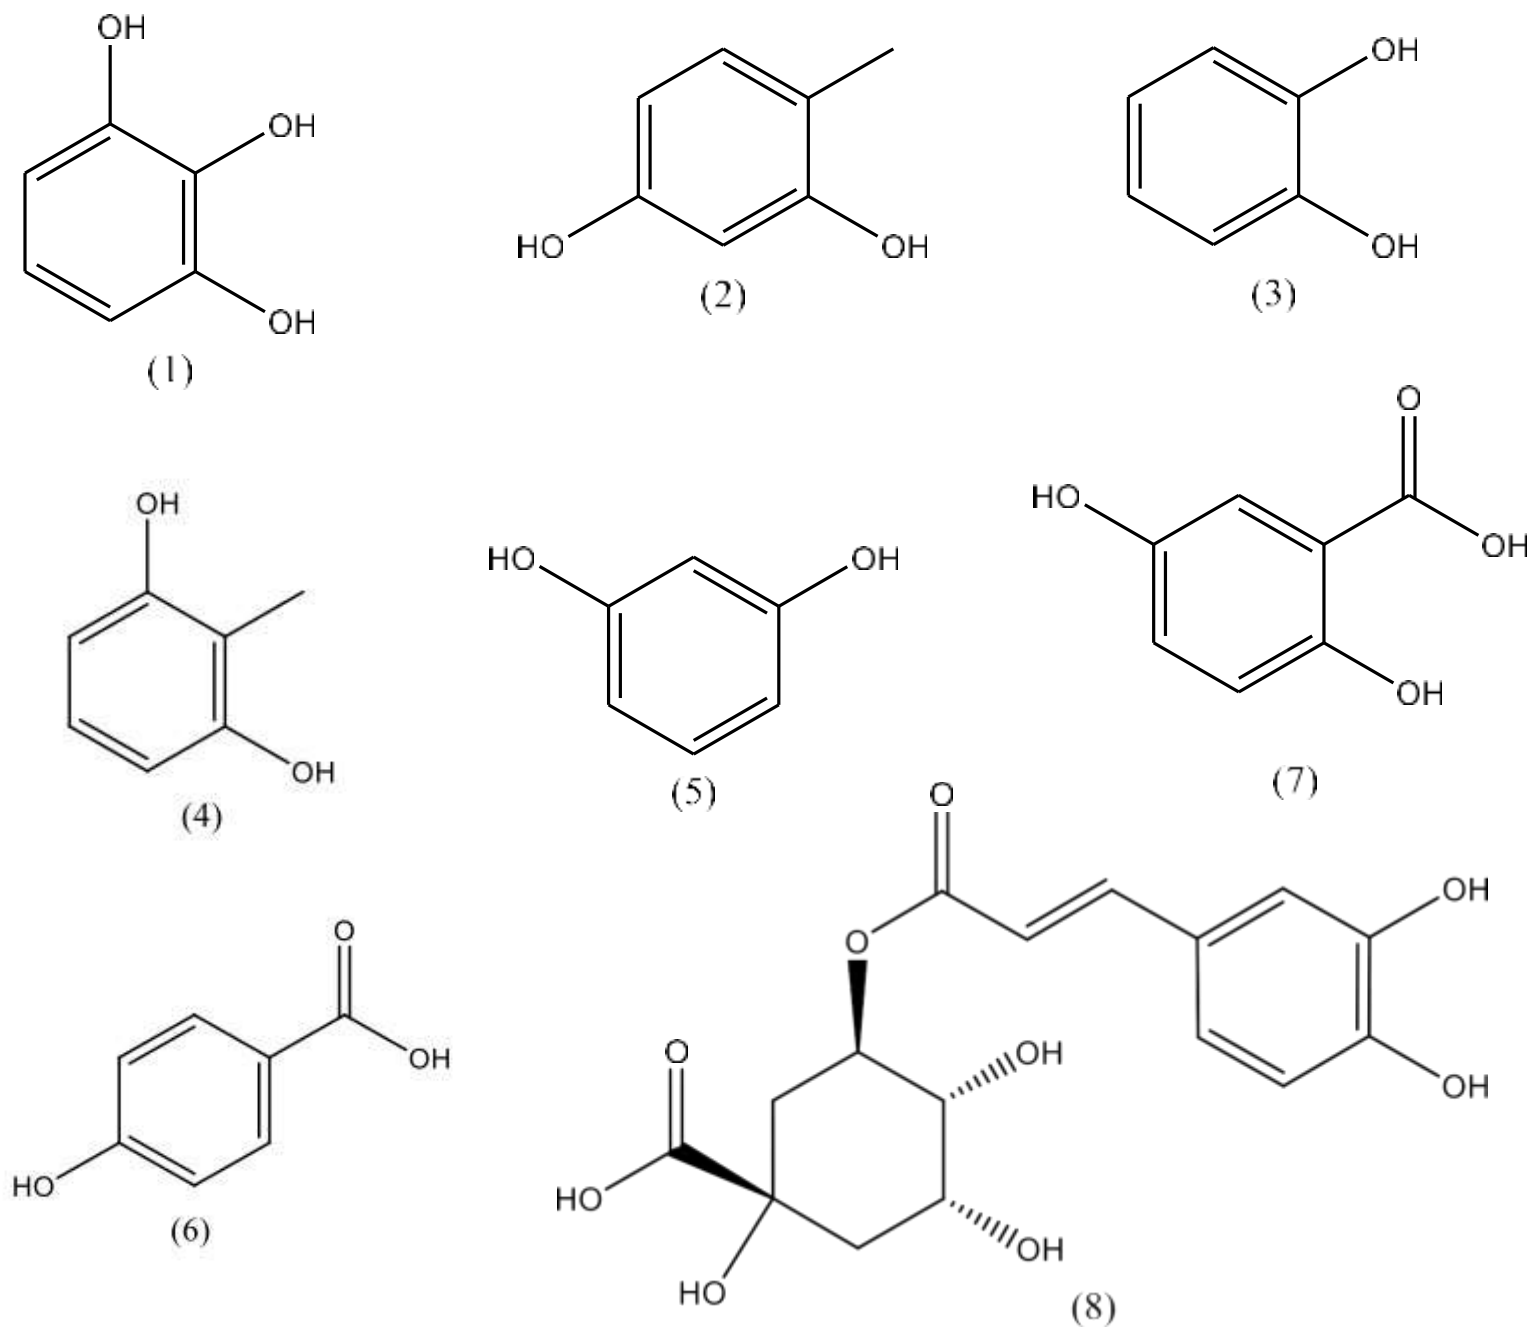

**Supplementary Figure 1S.** Structure of reported phenolic compounds from *E. crassipes*.

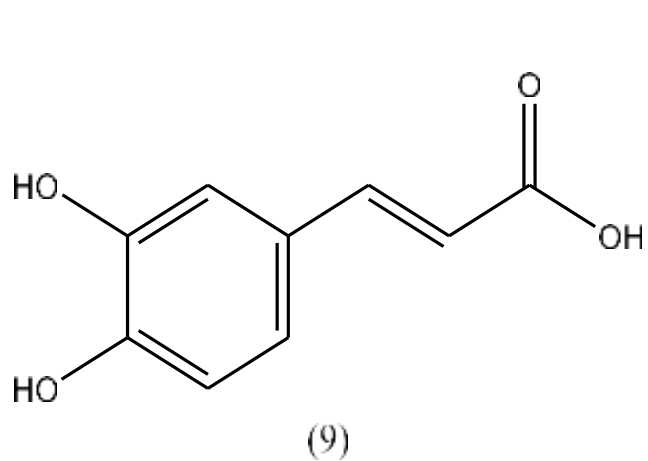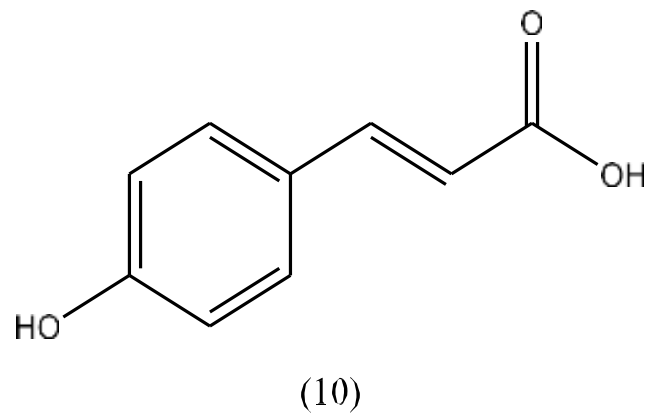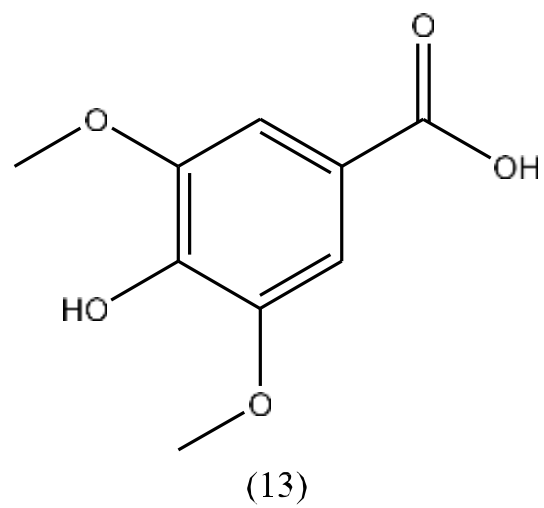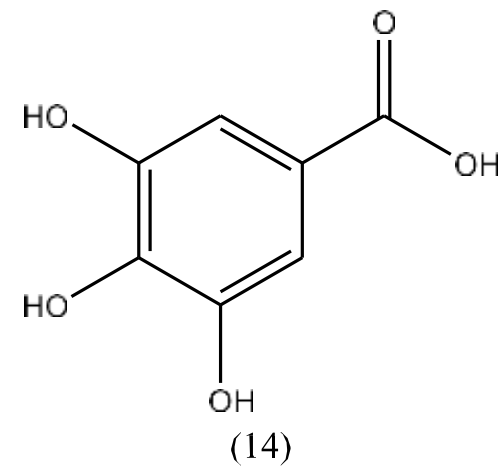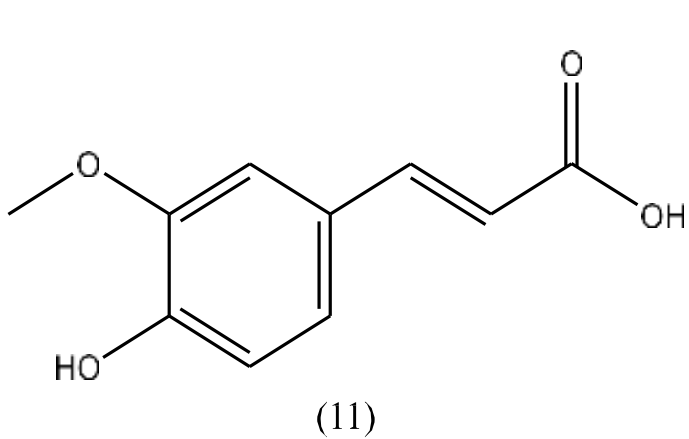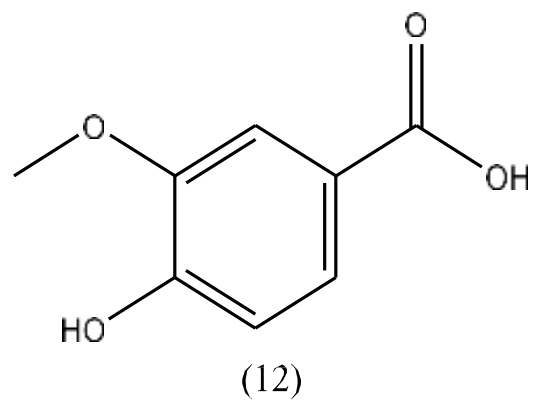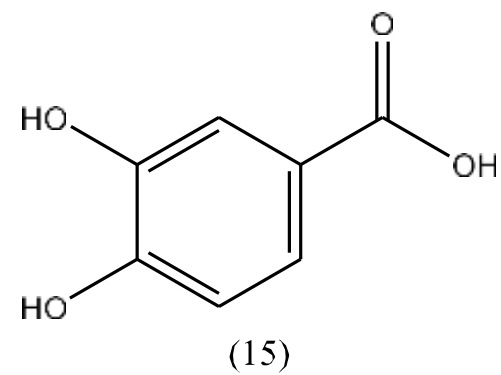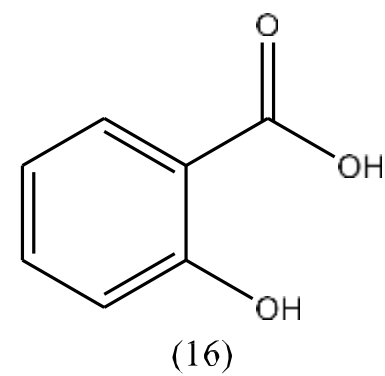

**Supplementary Figure 1S. Continued.**

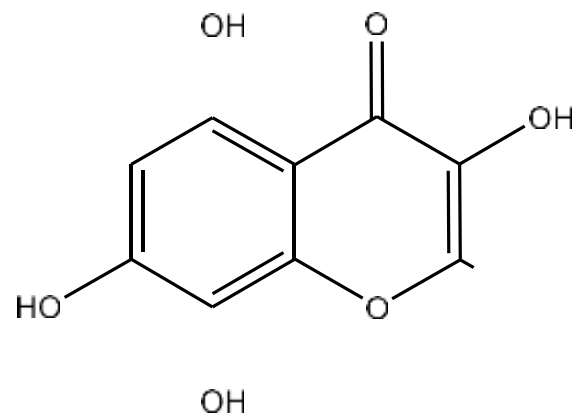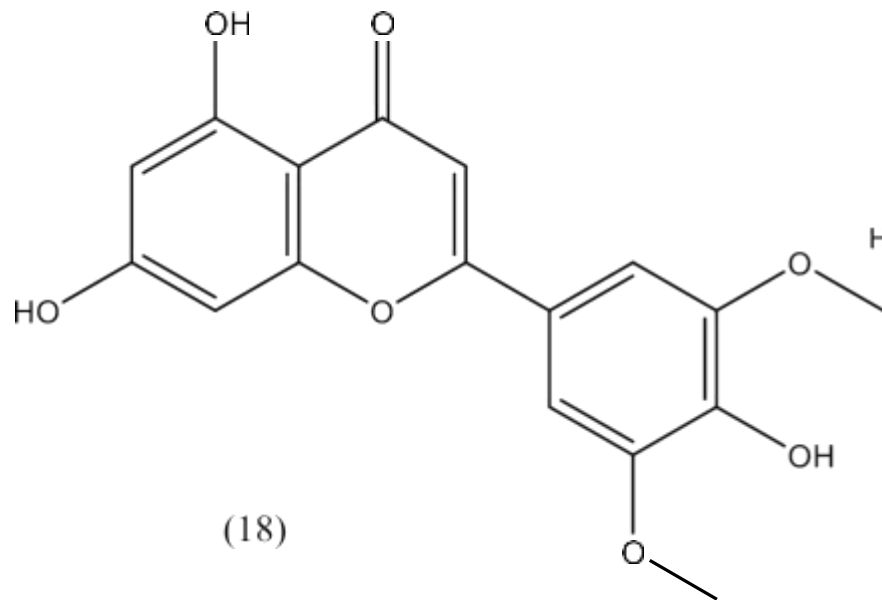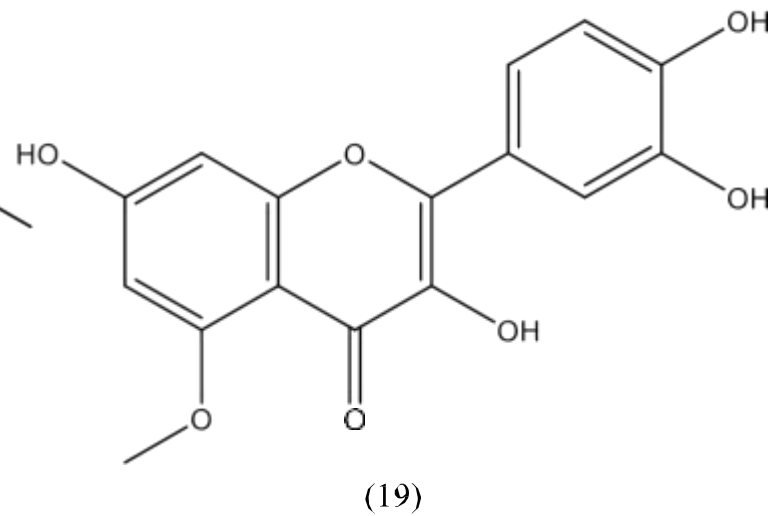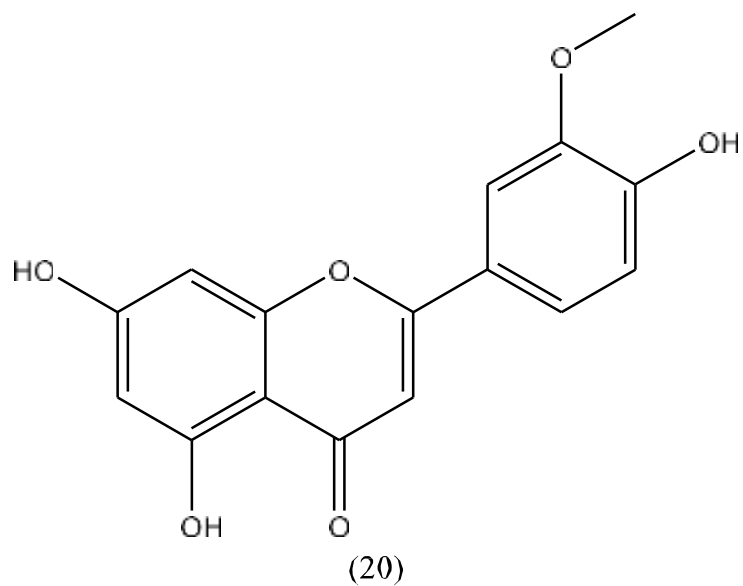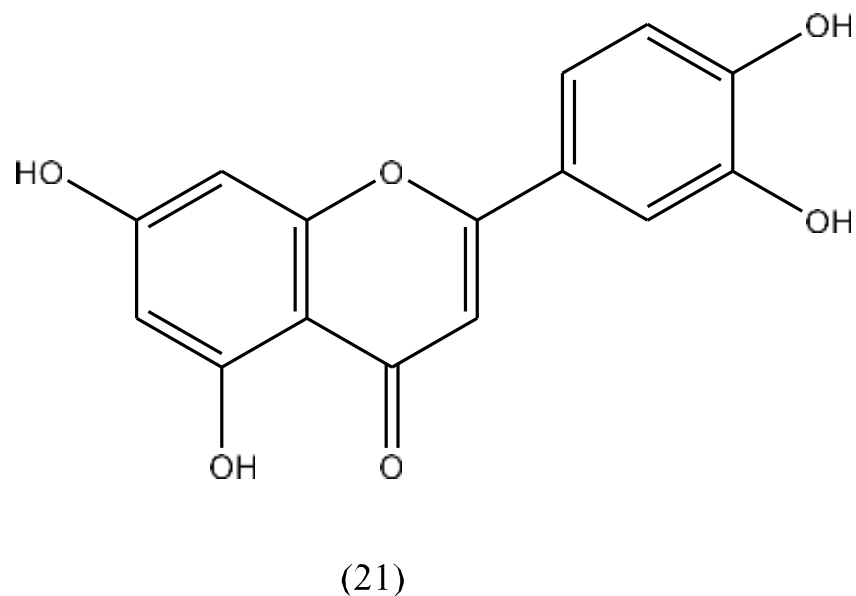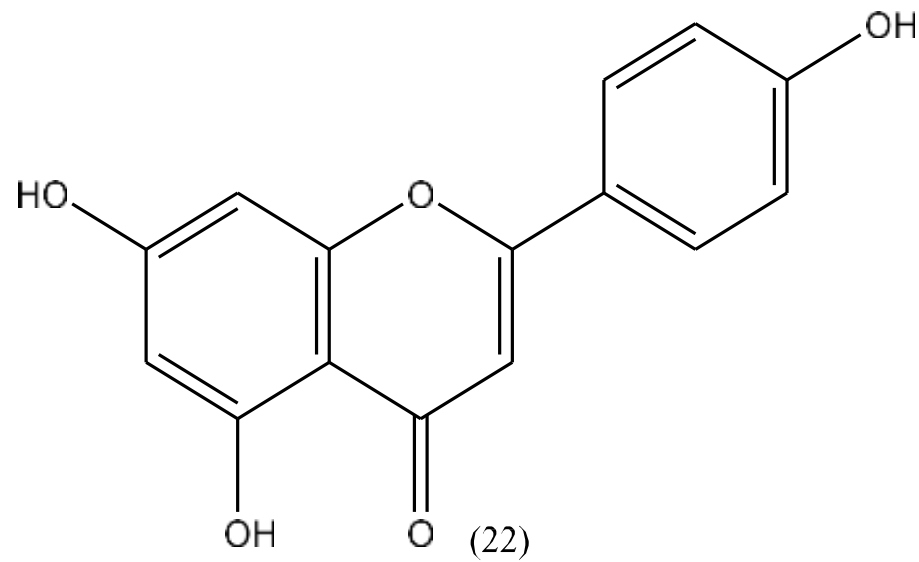

**Supplementary Figure 2S.** Structure of reported flavonoids from *E. crassipes*.

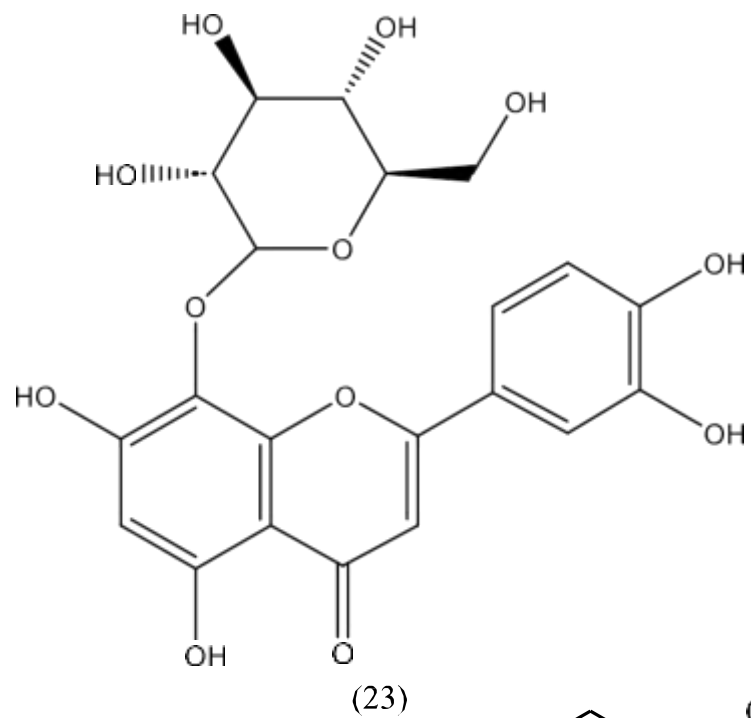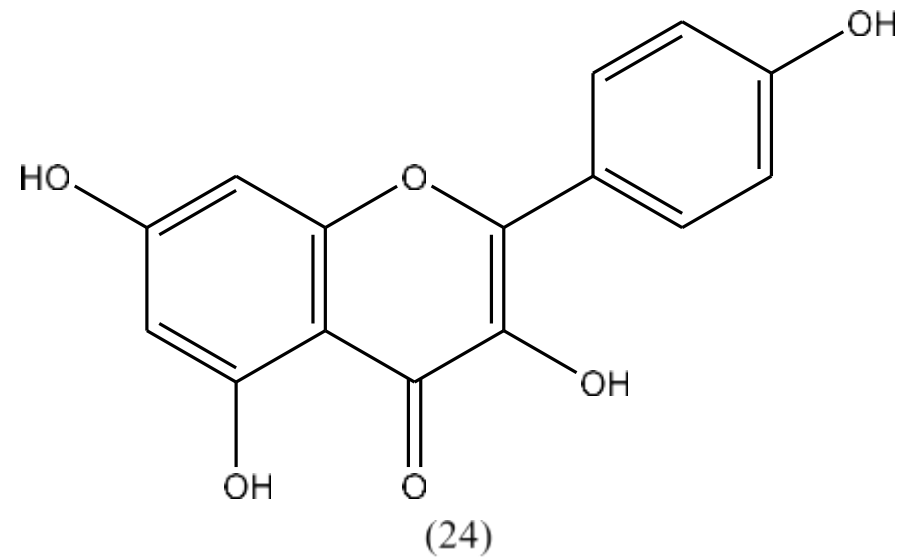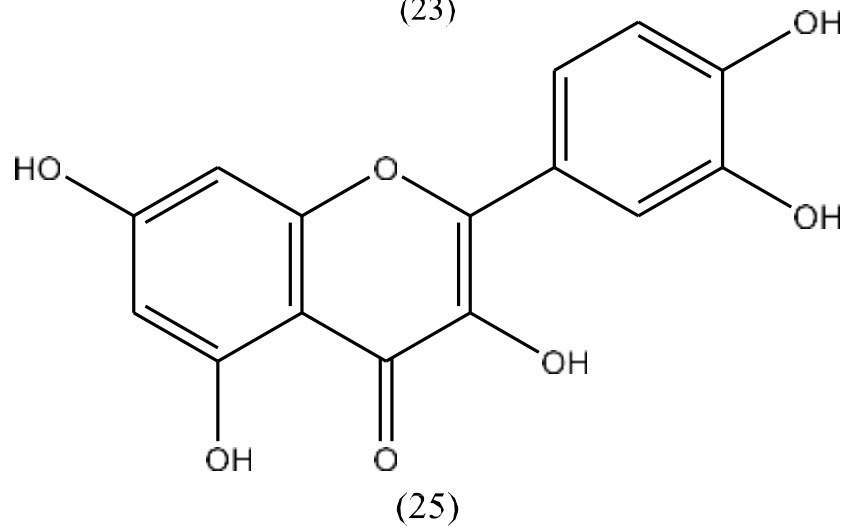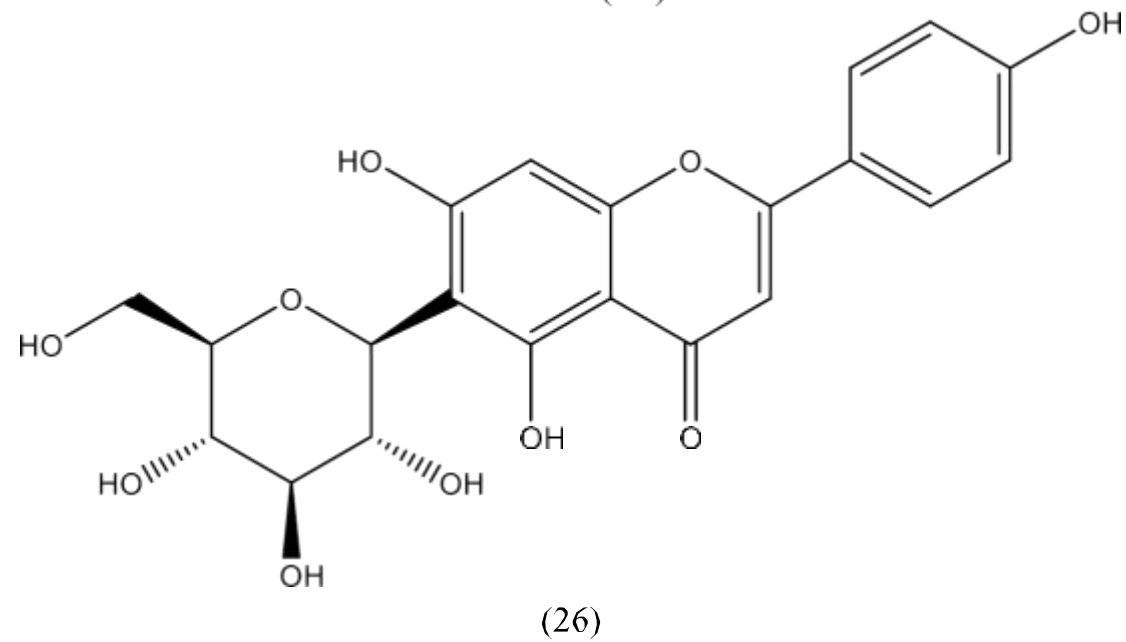

**Supplementary Figure 2S.** *Continued.*

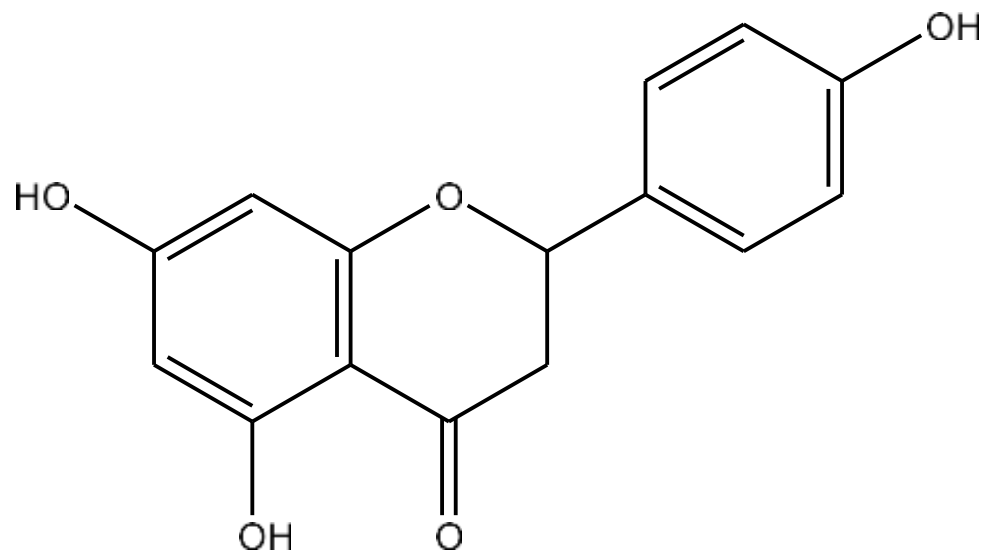

(27)

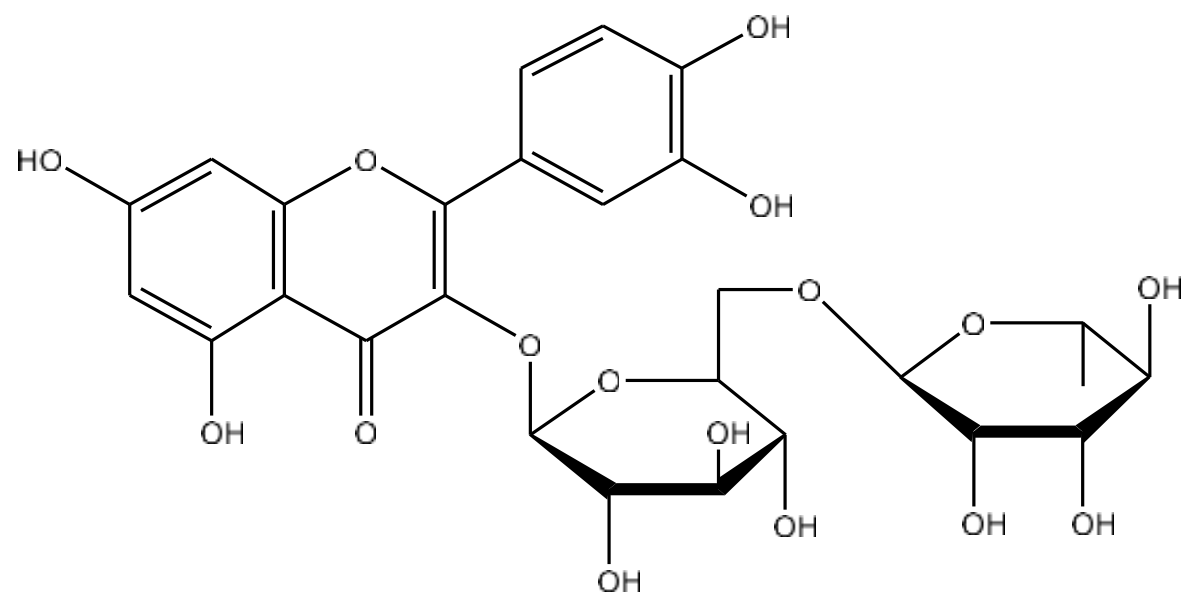

(29)

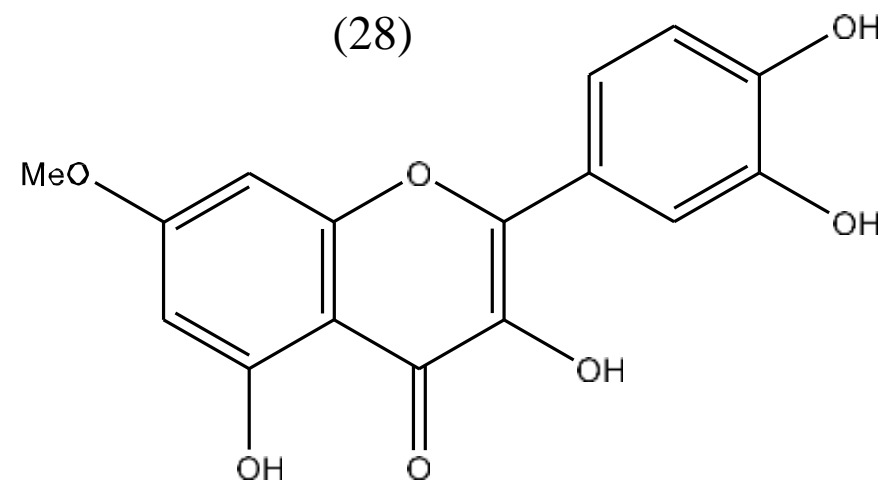

(30)

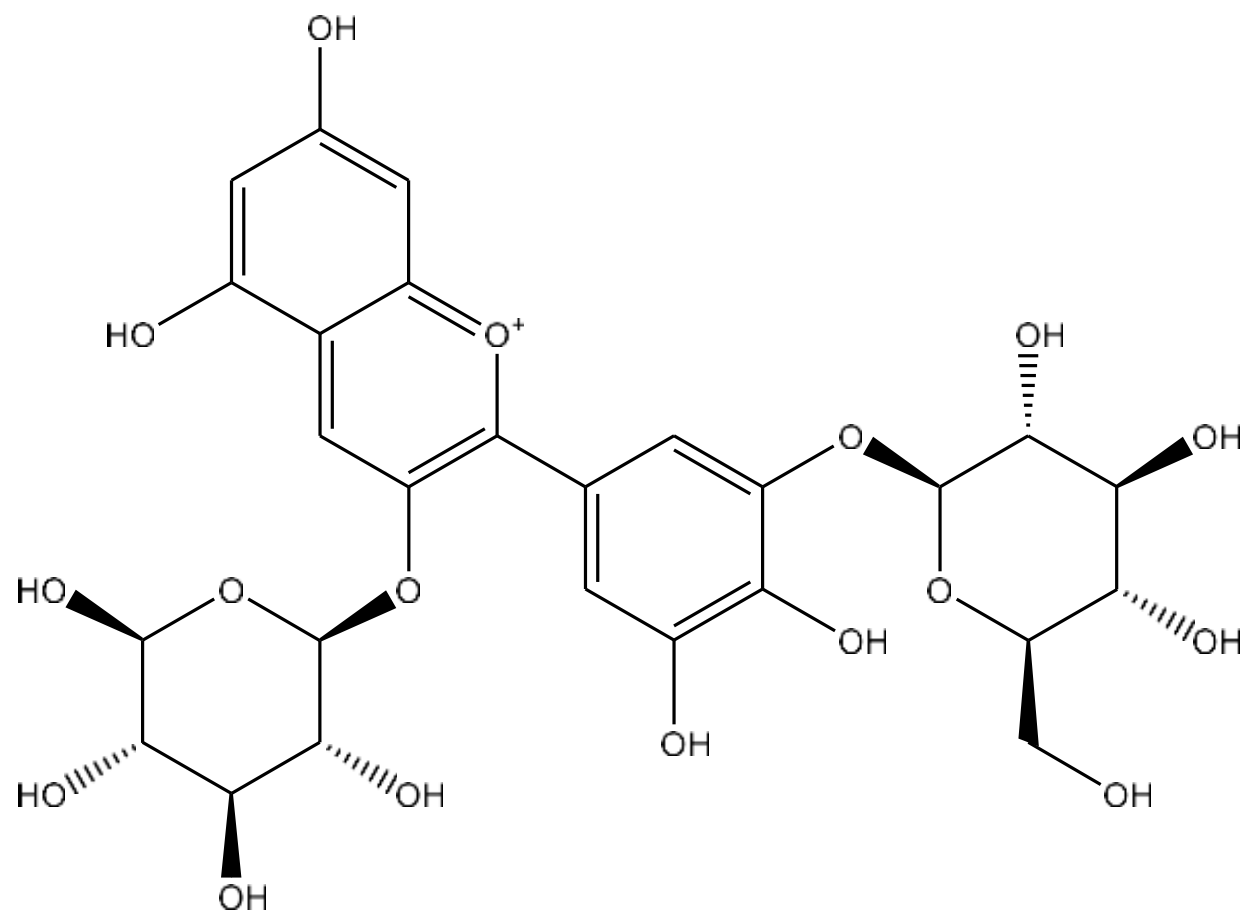

(31)

Supplementary Figure 2S.*Continued*

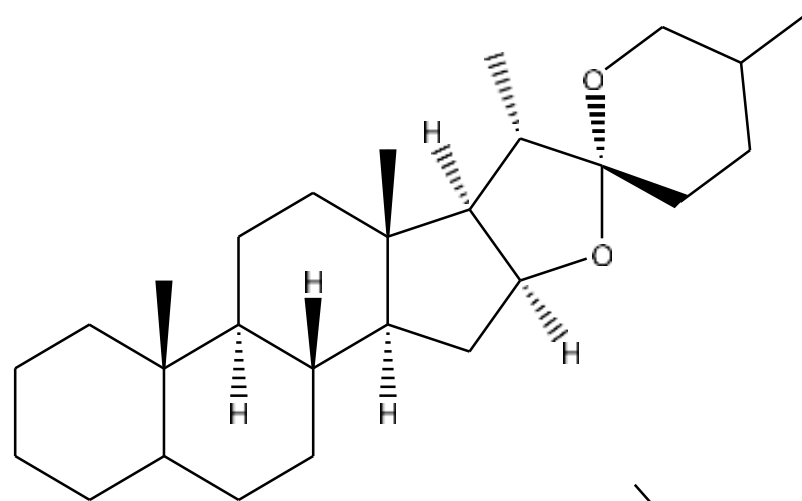

(32)

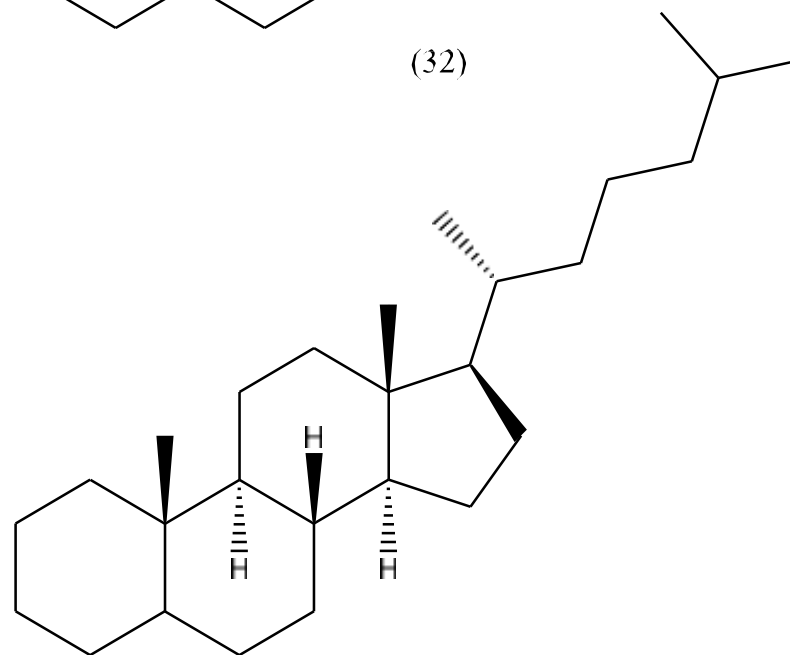

(33)

**Supplementary Figure 3S.** Structure of saponins from *E. crassipes*.



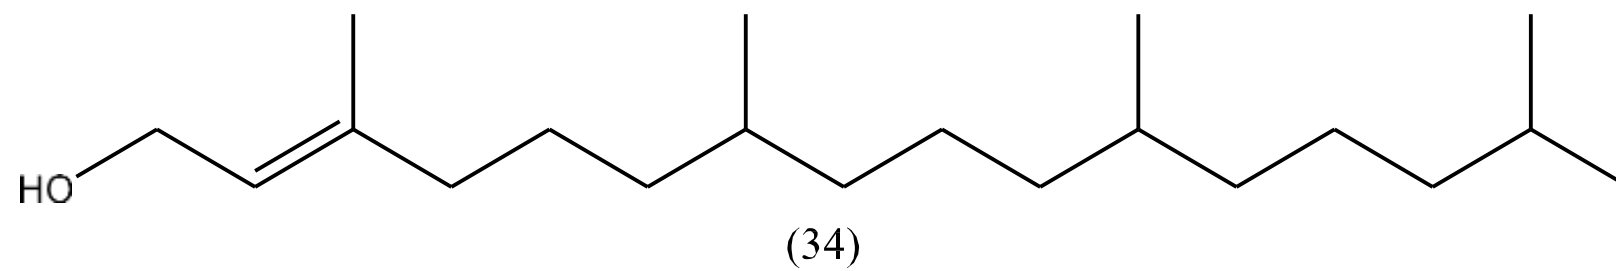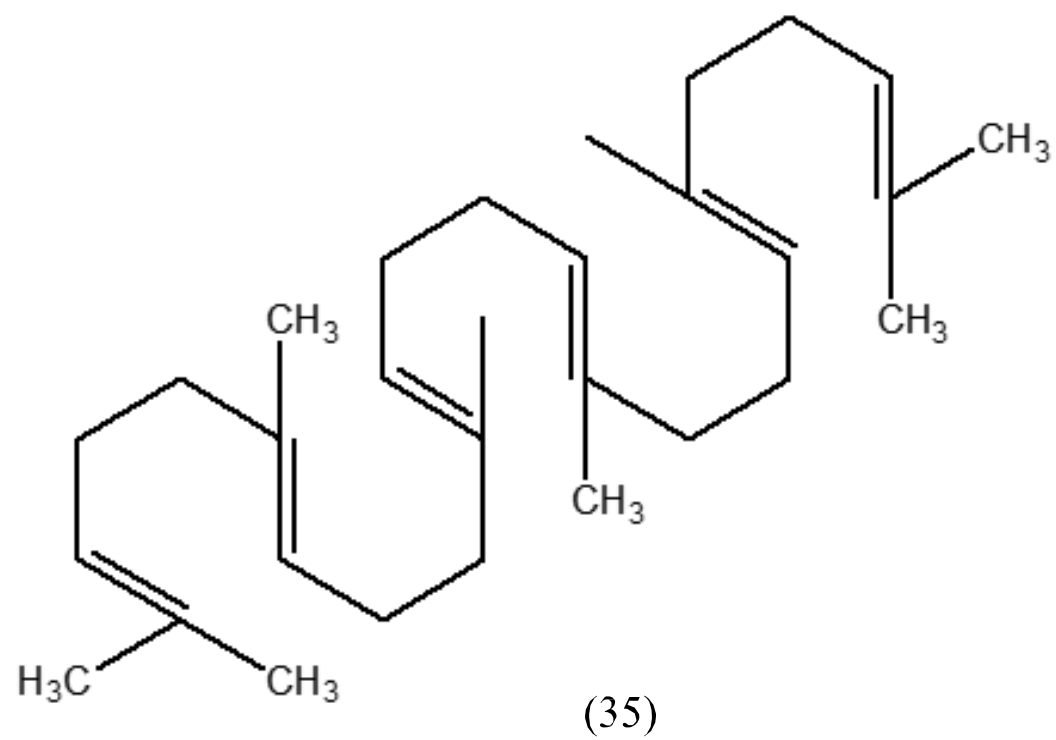

**Supplementary Figure 4S.** Structure of reported terpenoids from *E. crassipes*.

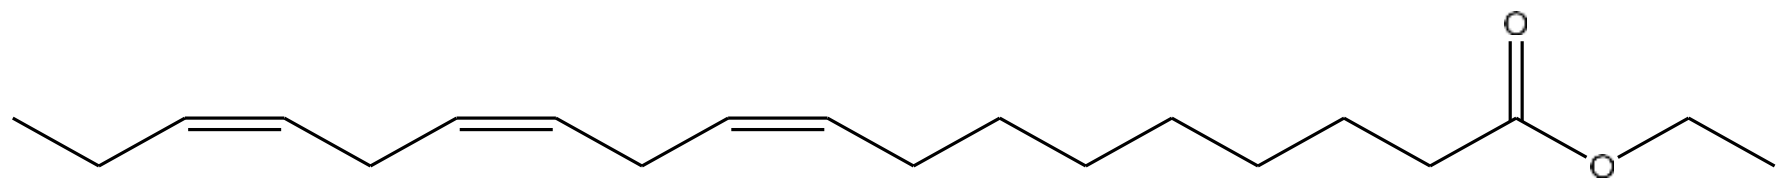

(37)

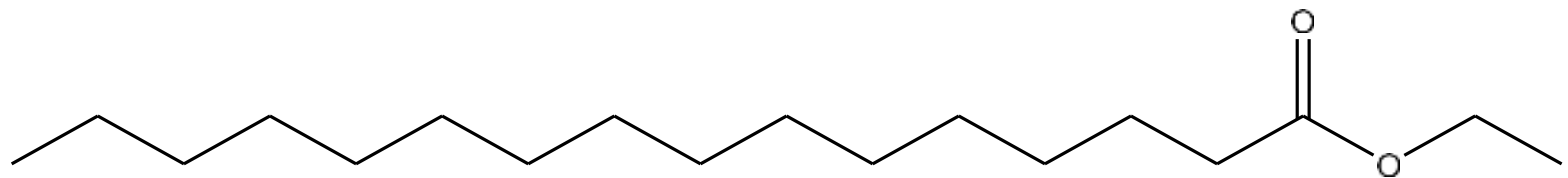

(38)

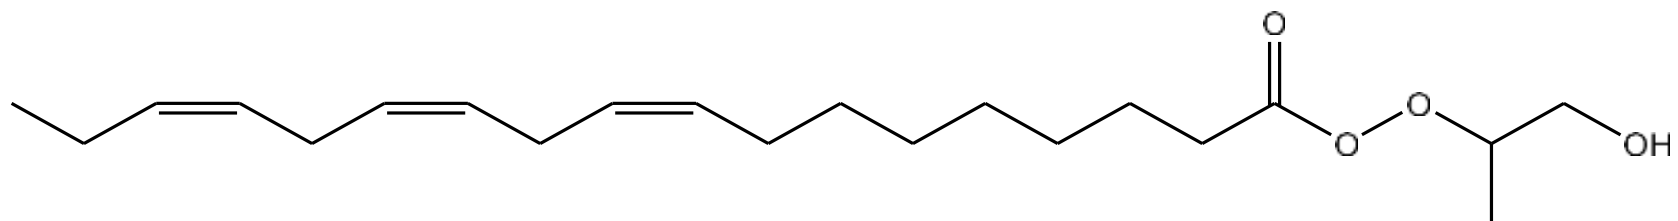

(39)

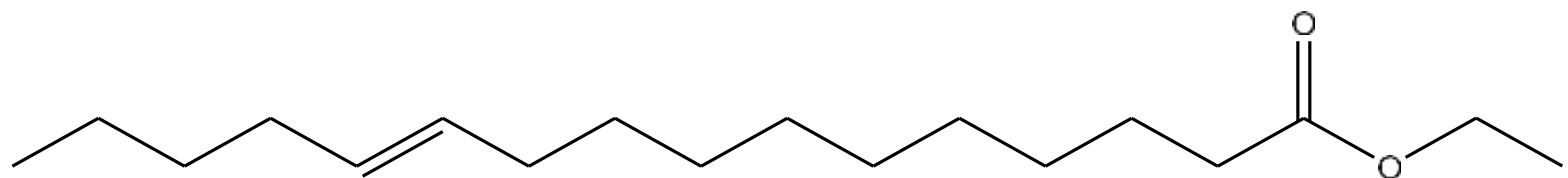

(40)

**Supplementary Figure 5S.** Structure of reported fatty acids from *E. crassipes*.

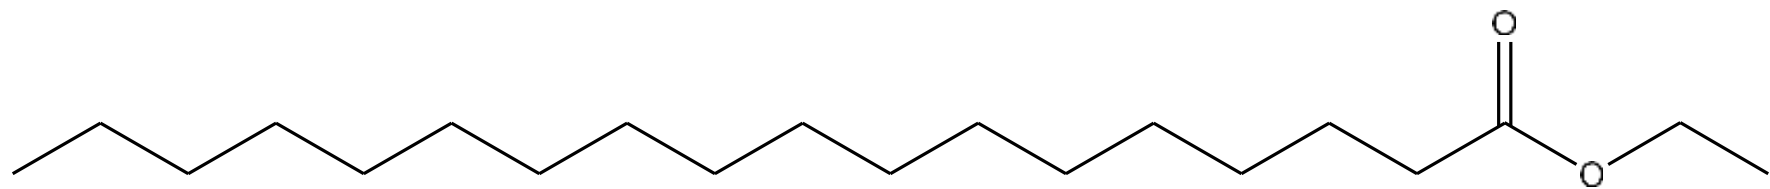

(41)

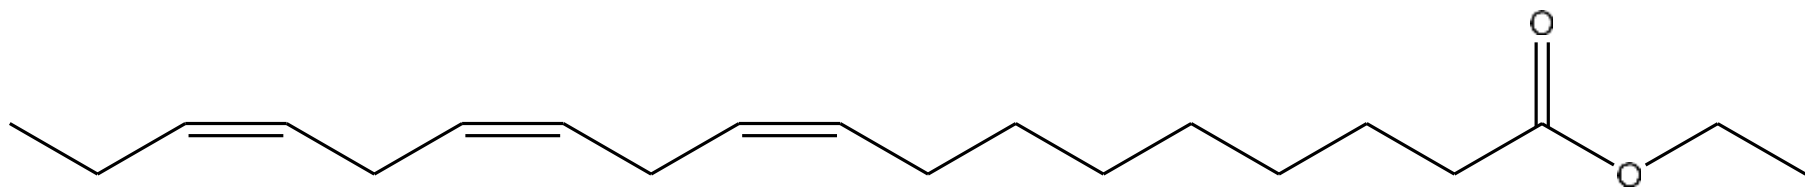

(42)

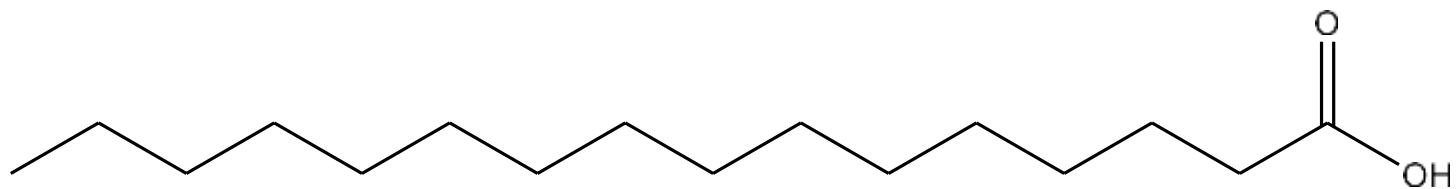

(43)

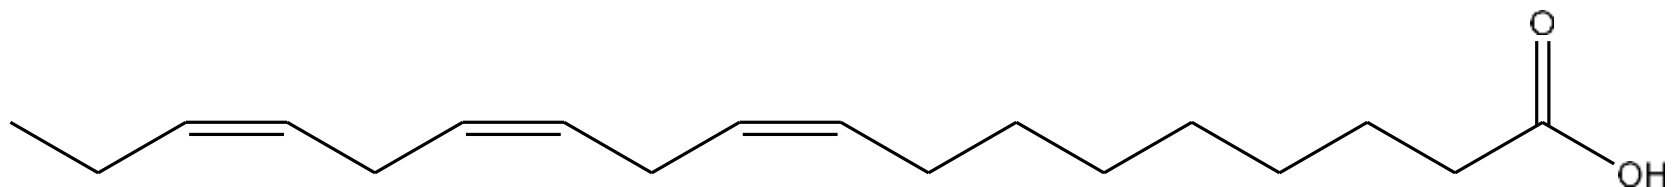

(44)

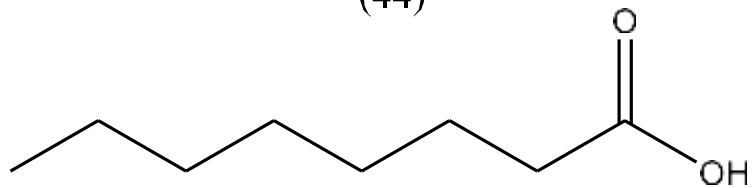

(45)

**Supplementary Figure 5S.** *Continued*

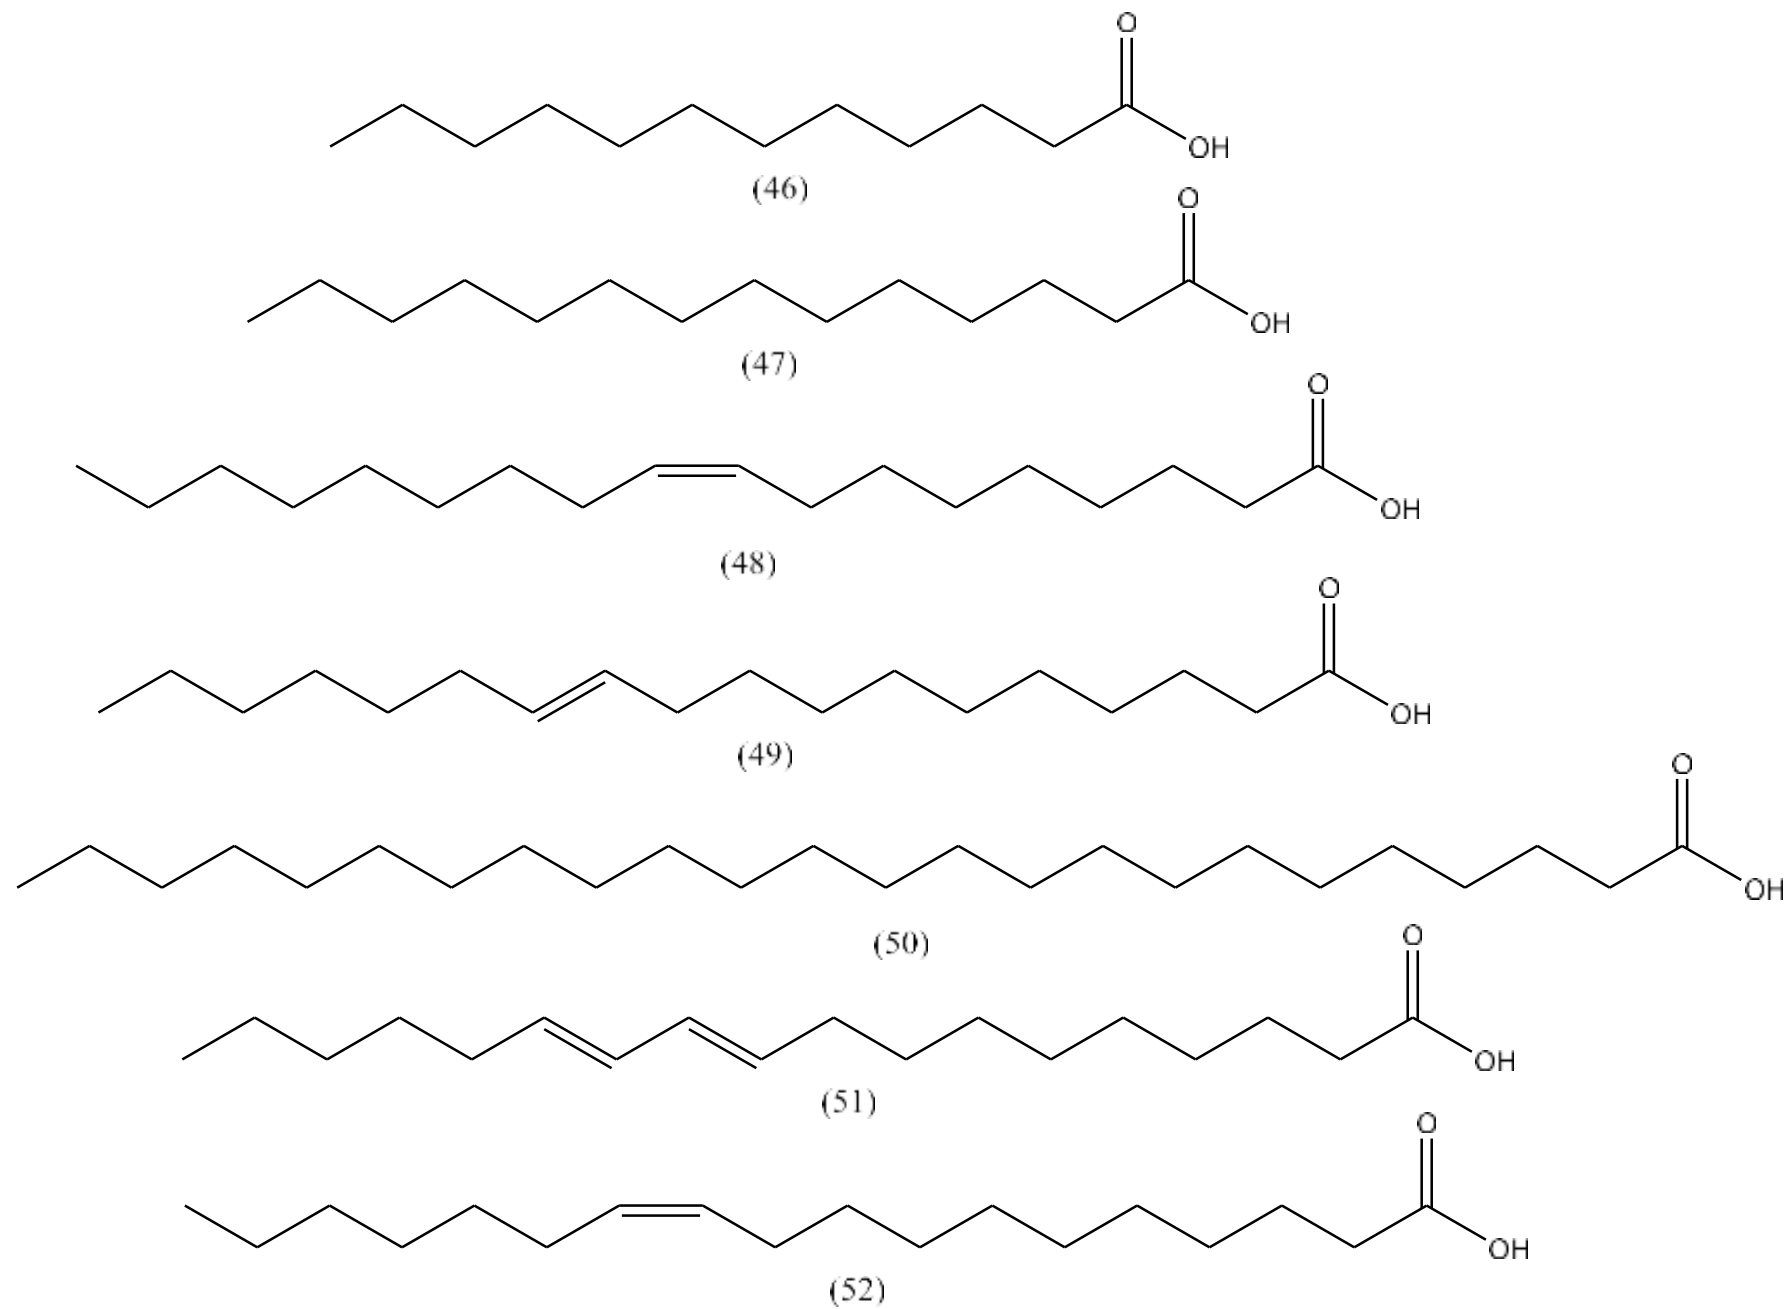

**Supplementary Figure 5S.** *Continued*

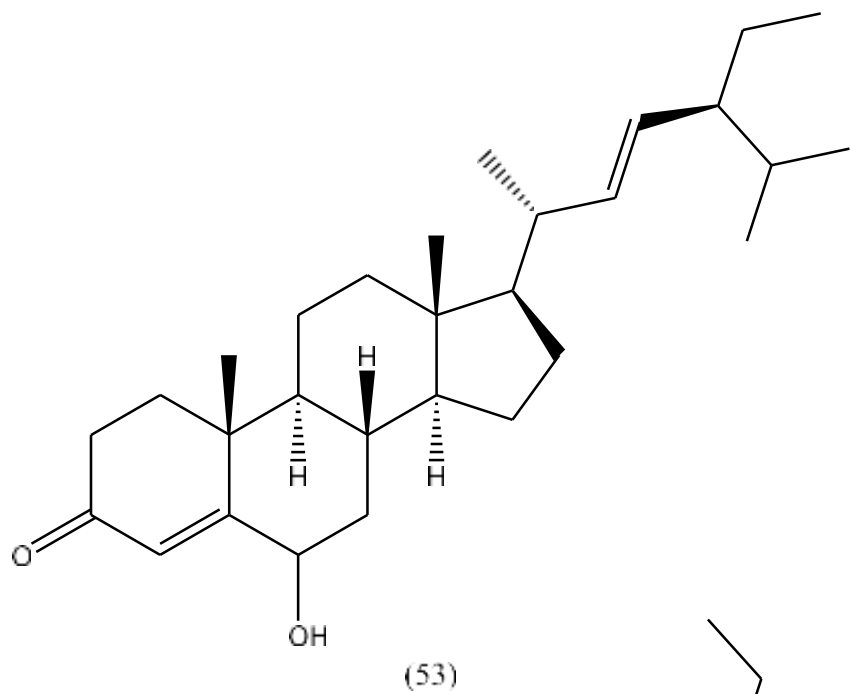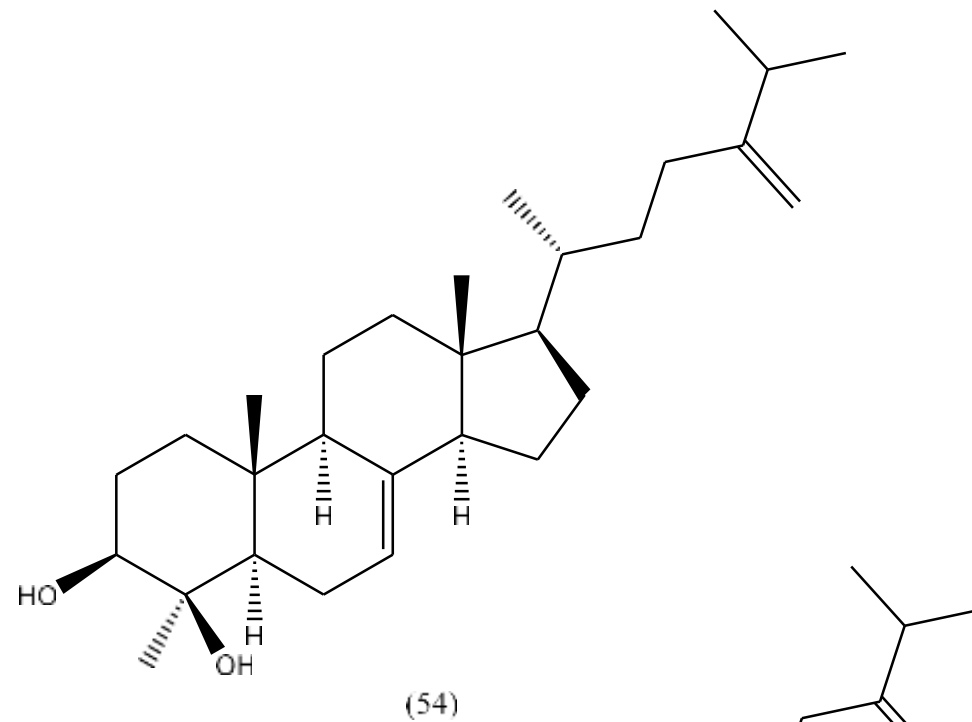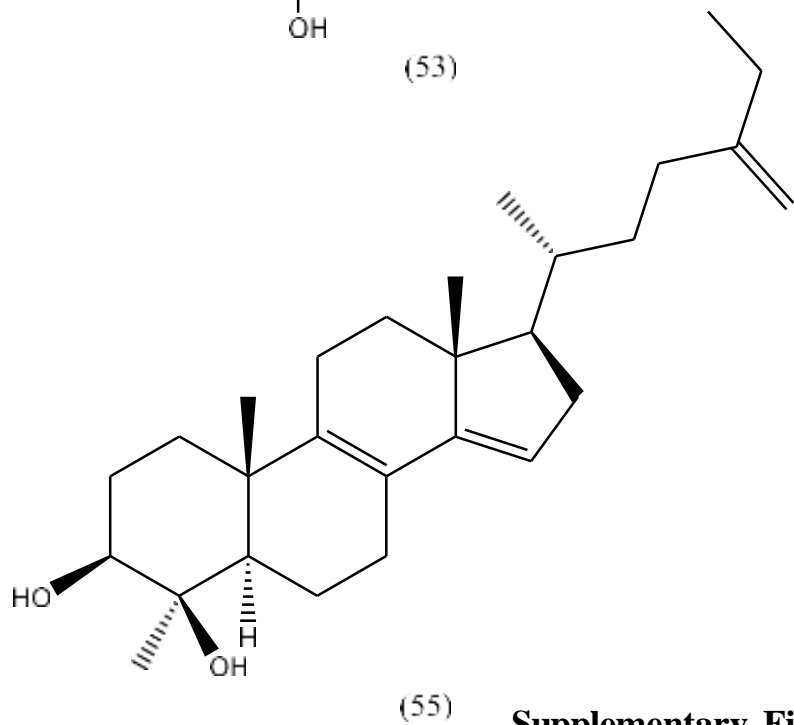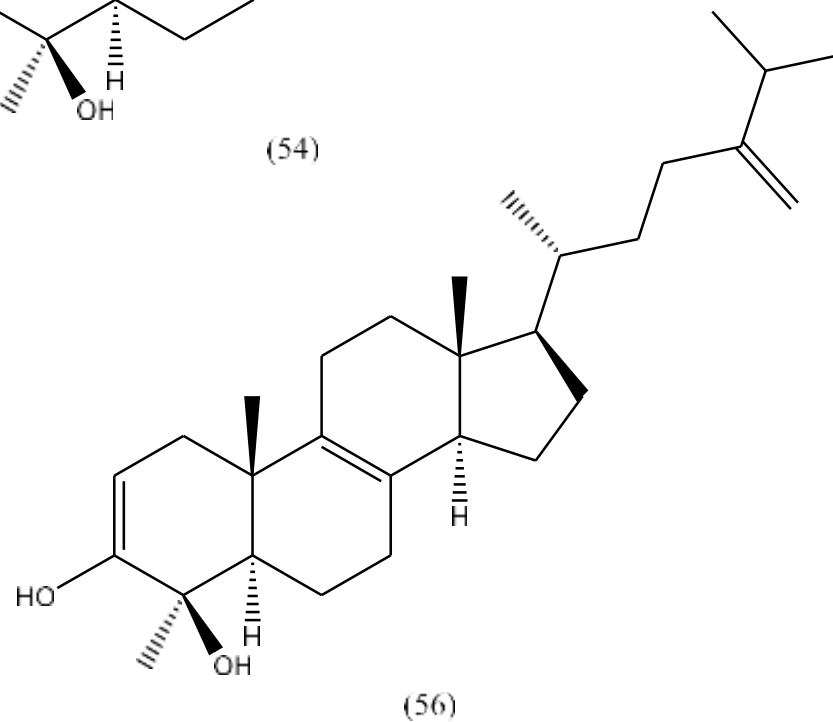

**Supplementary Figure 6S.** Structure of reported sterols from *E. crassipes*.

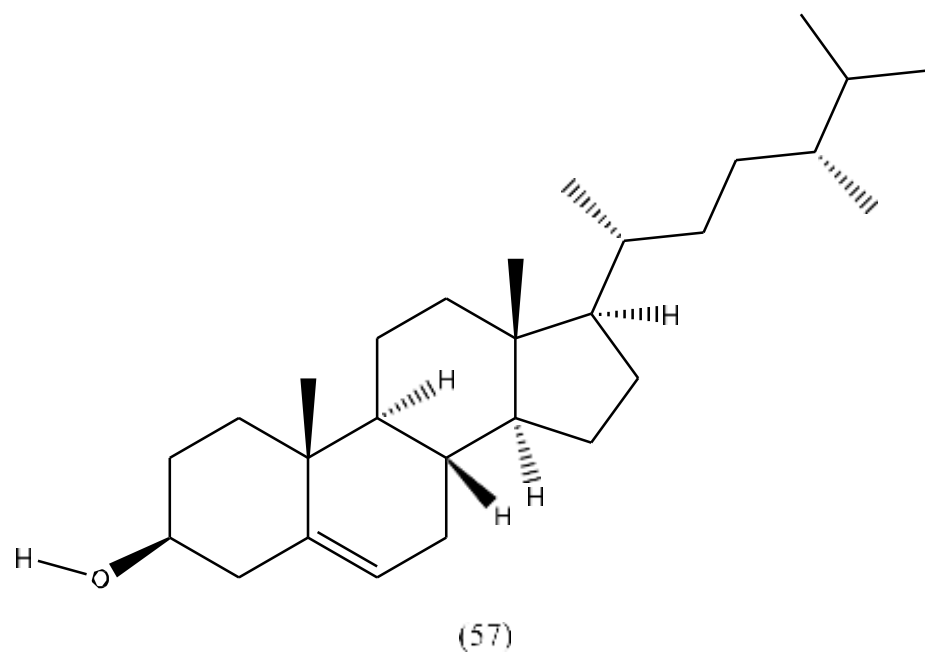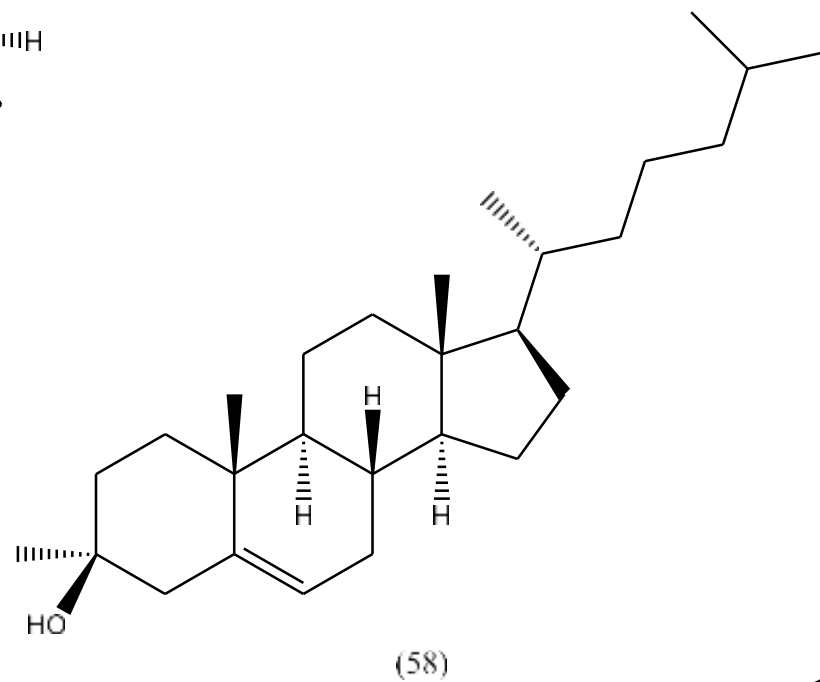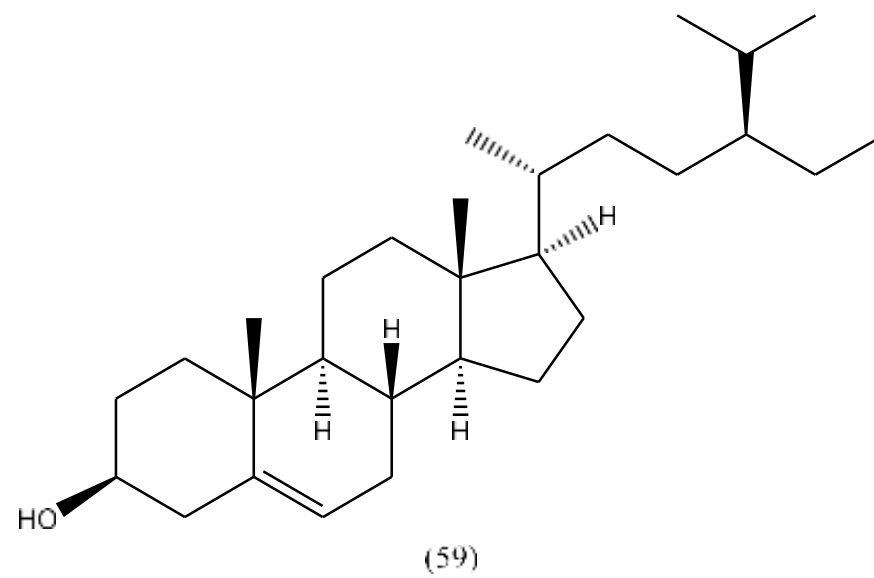

Supplementary Figure 6S. *Continued*

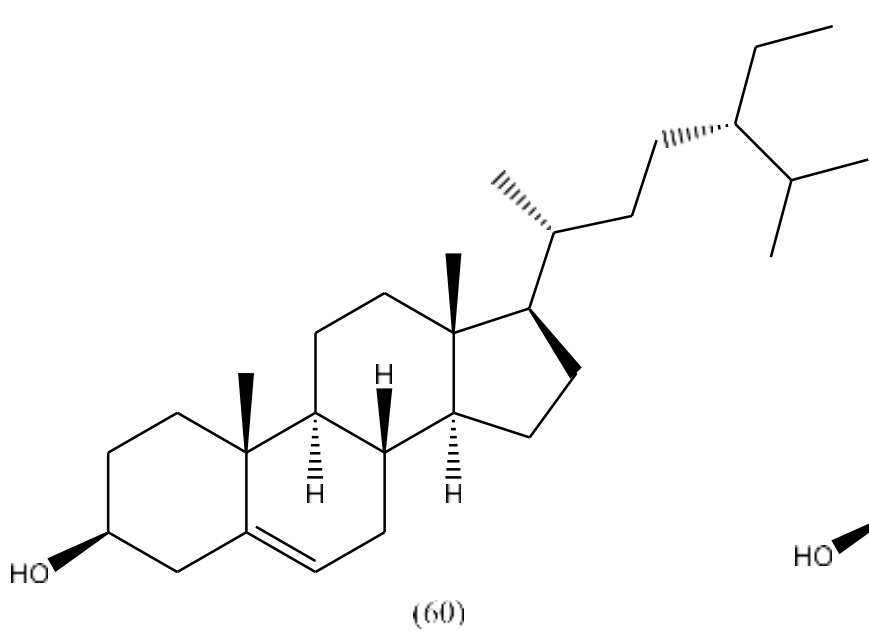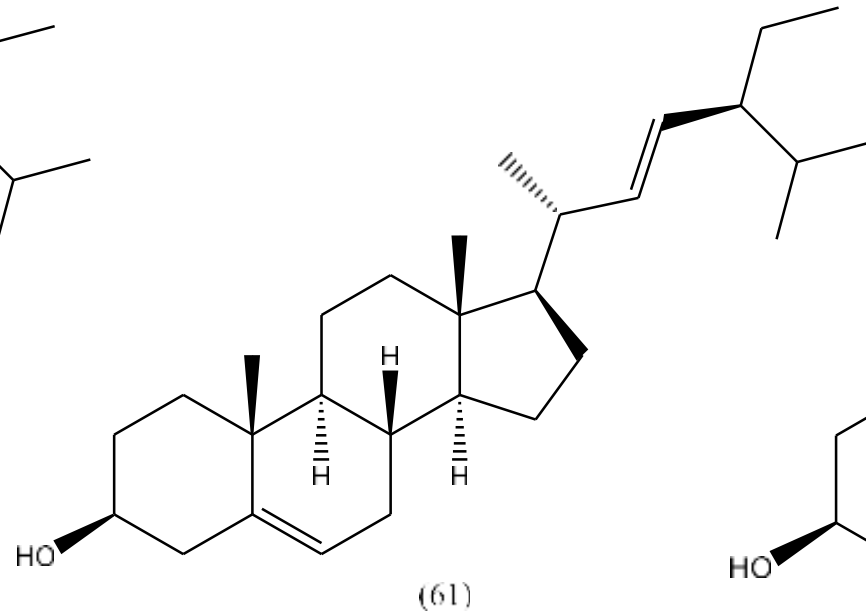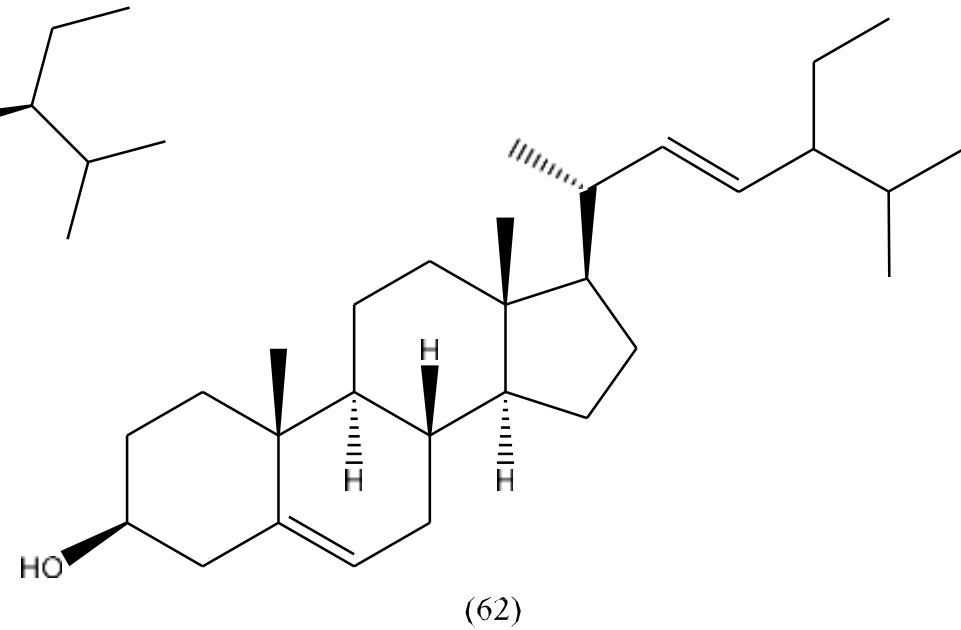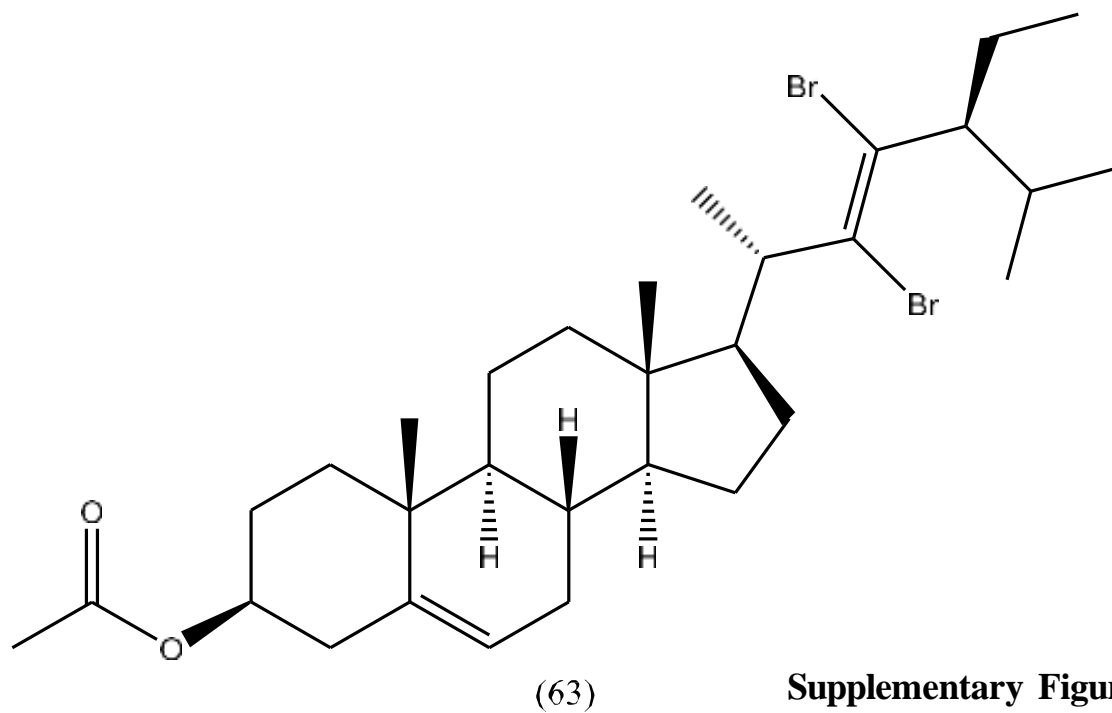

Supplementary Figure 6S. Continued

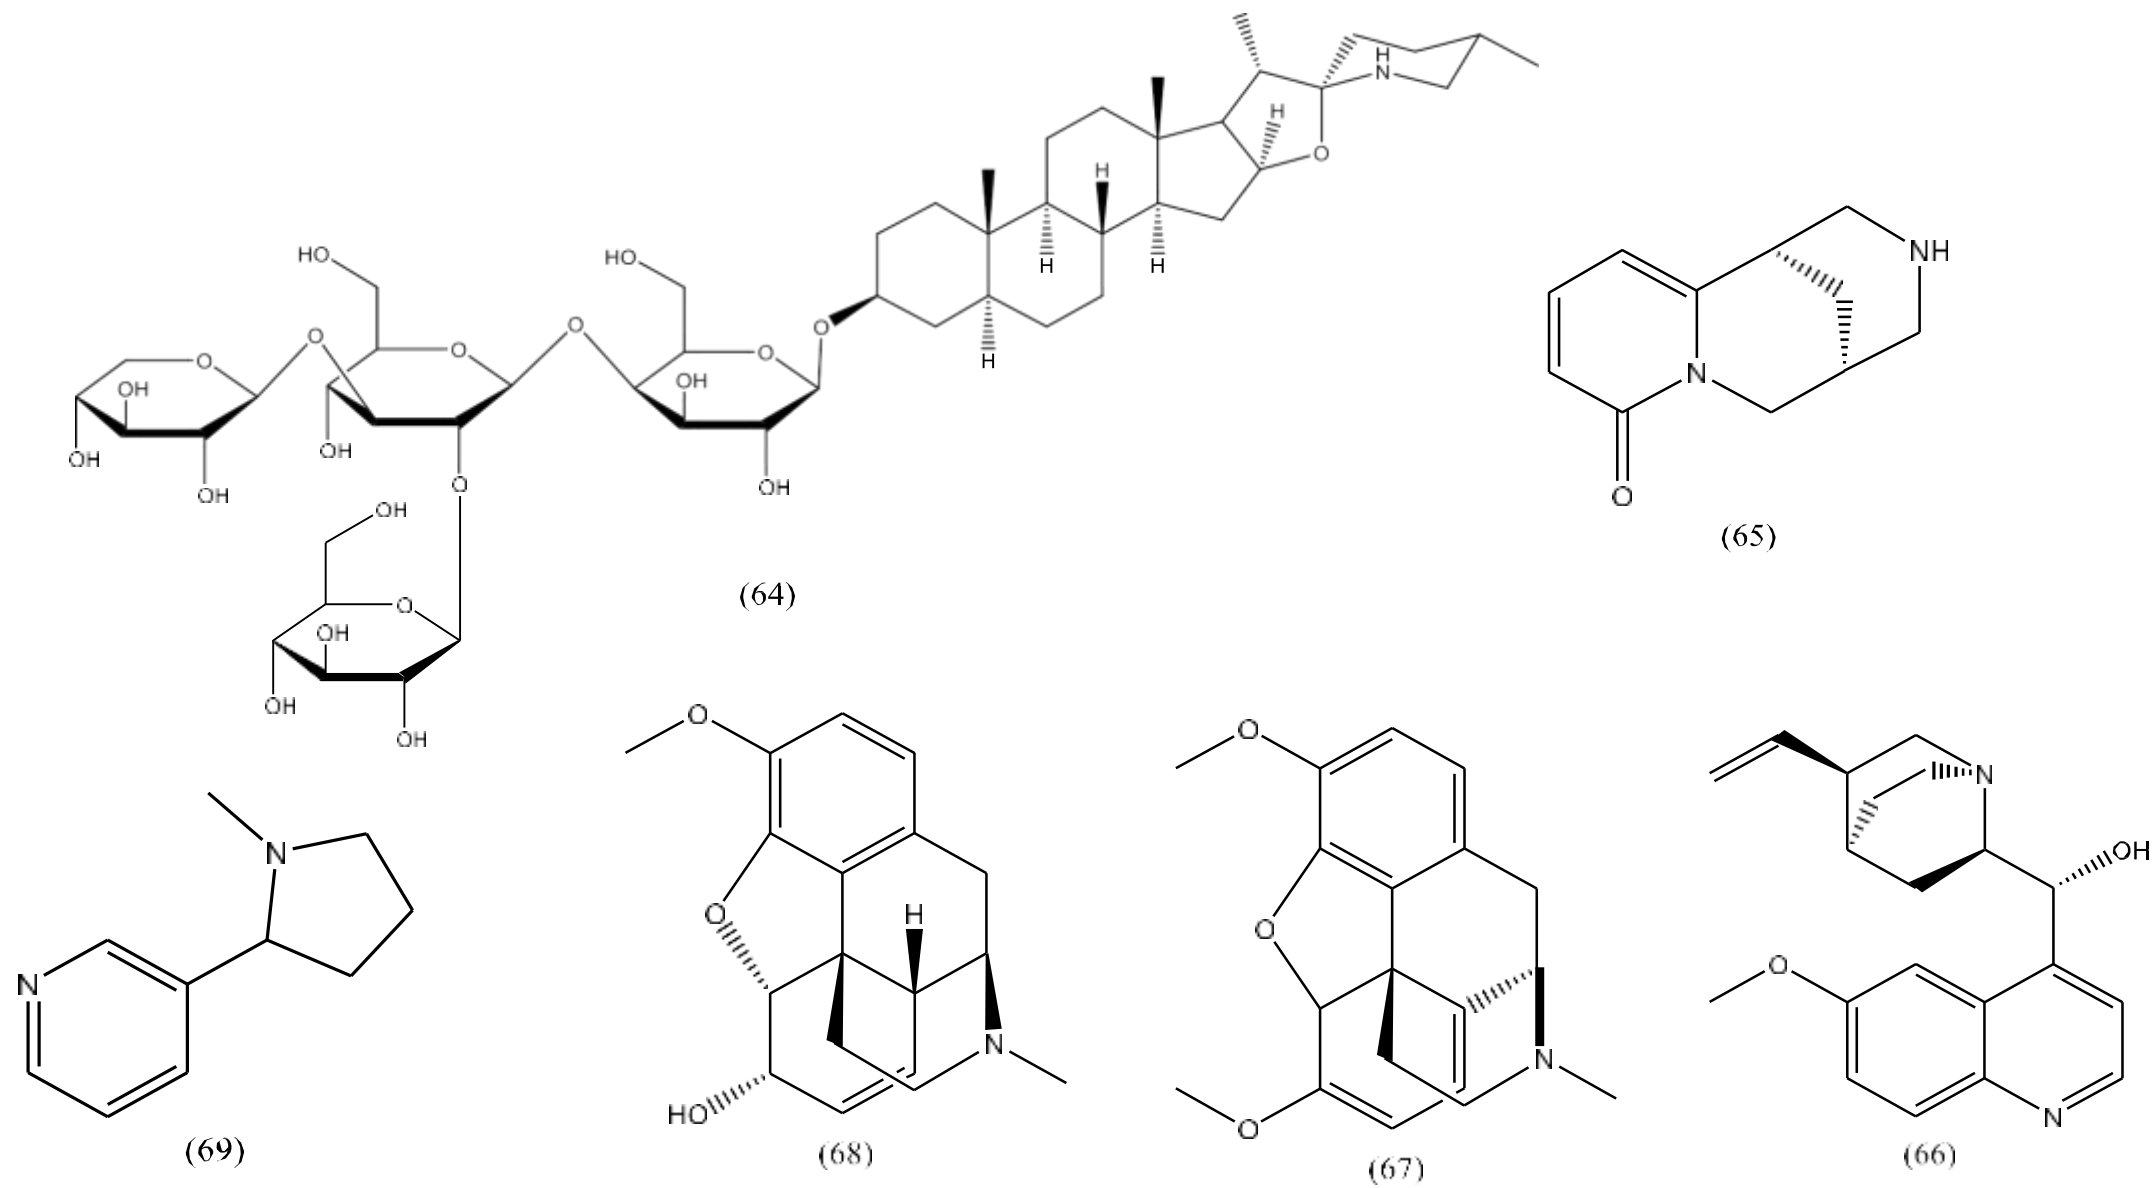

**Supplementary Figure 7S.** Structure of alkaloids from *E. crassipes*.



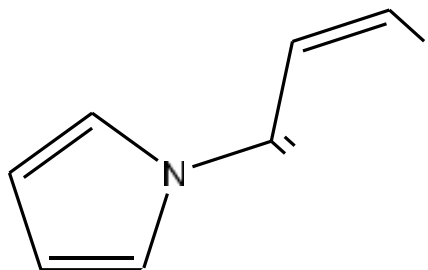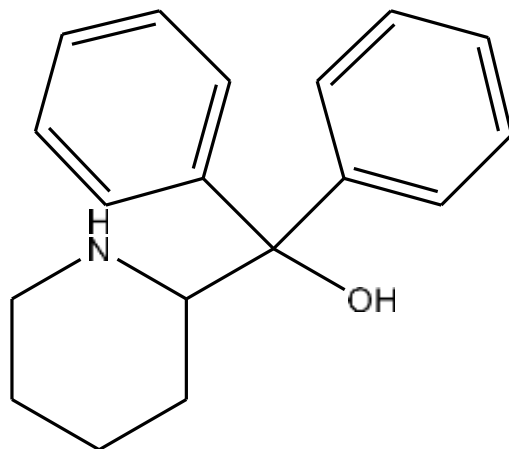

(71)

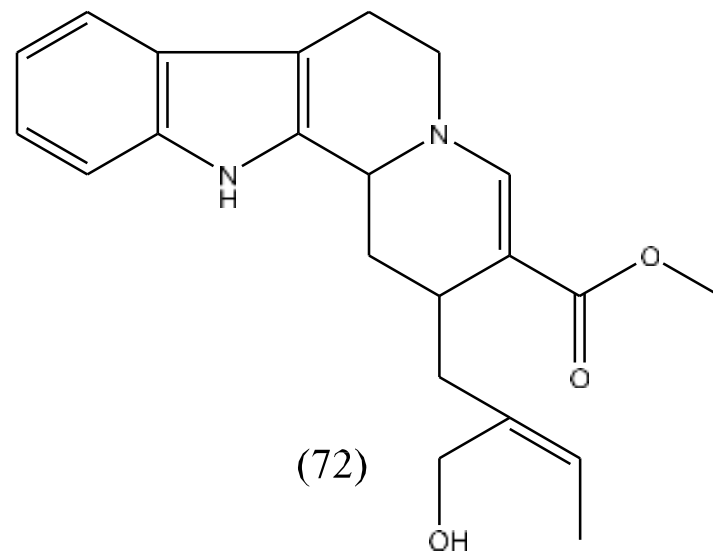

(72)

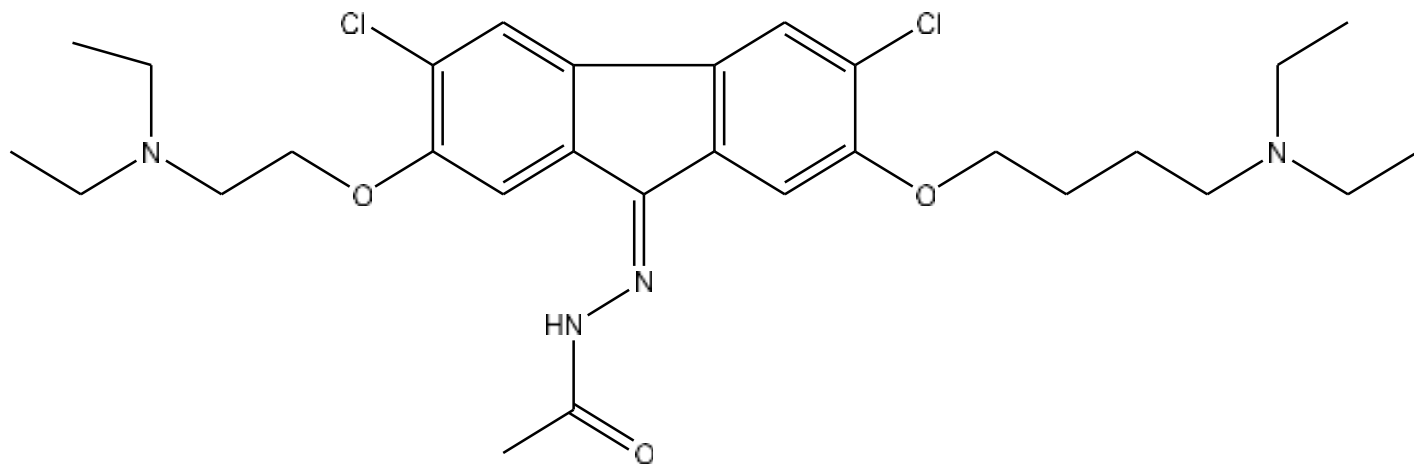

(73)

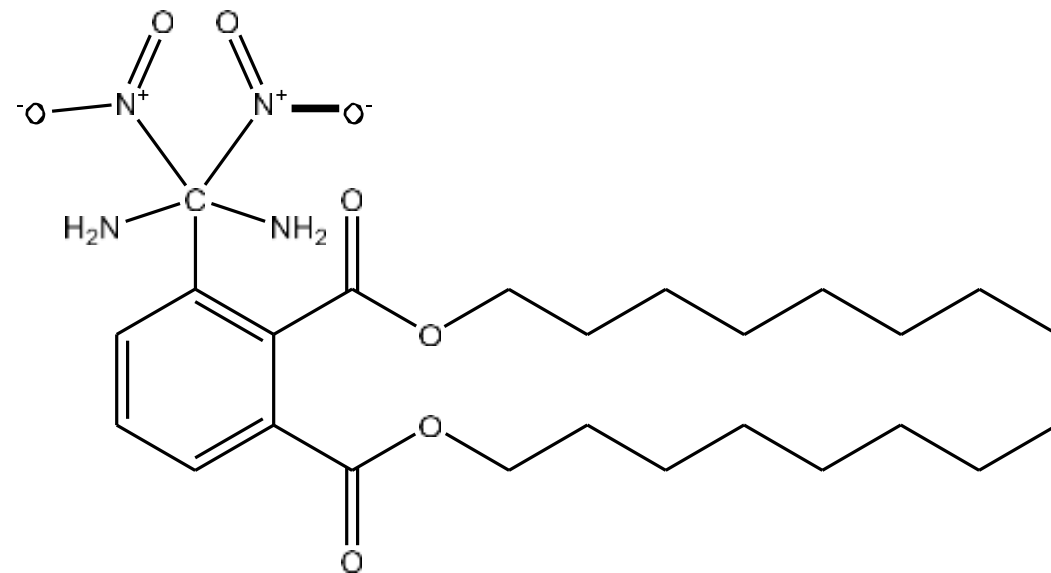

(74)

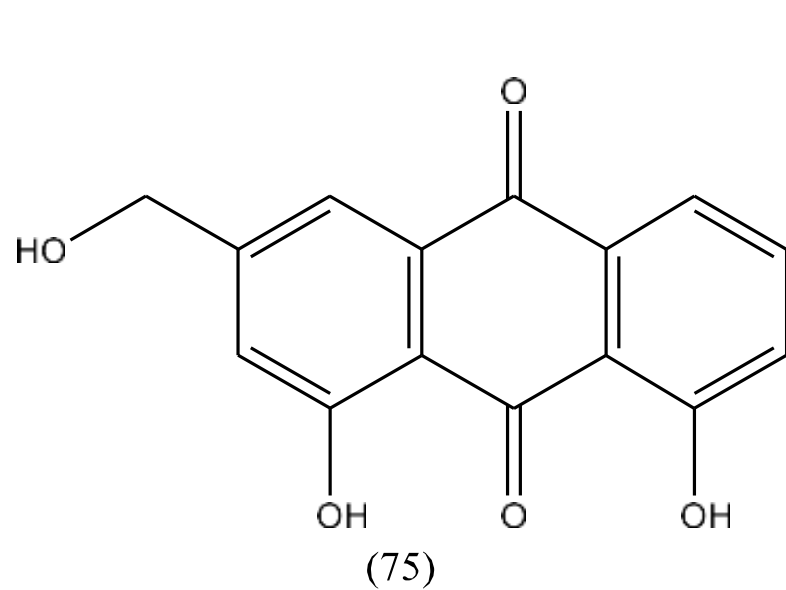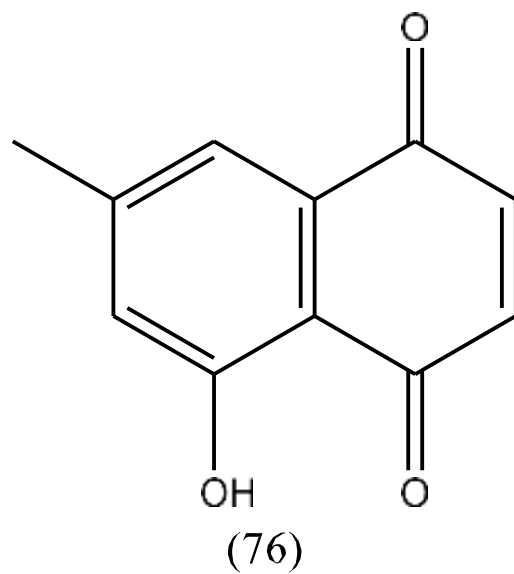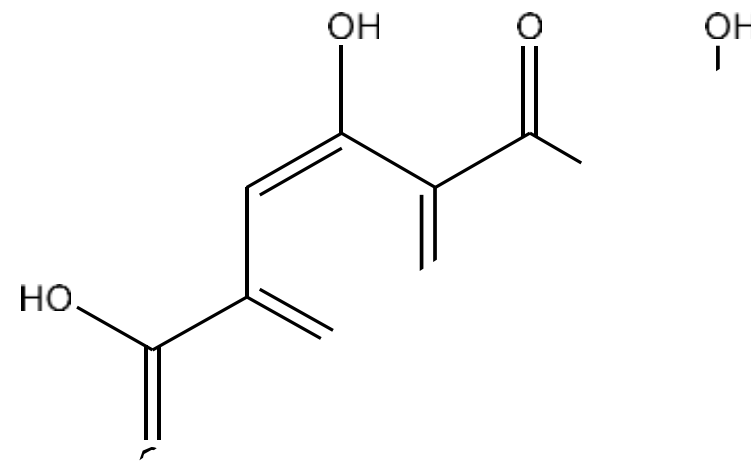

**Supplementary Figure 8S.** Structure of reported quinones from *E. crassipes*.

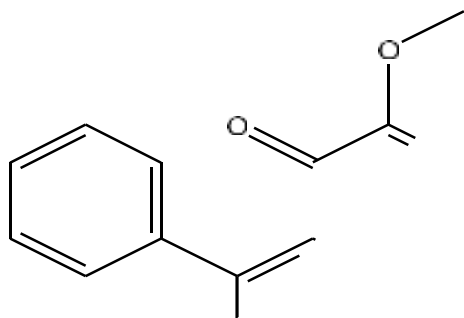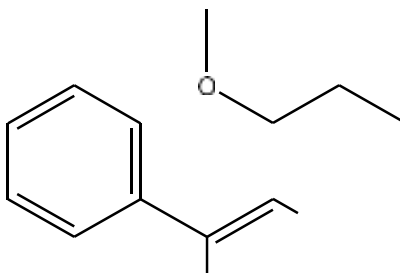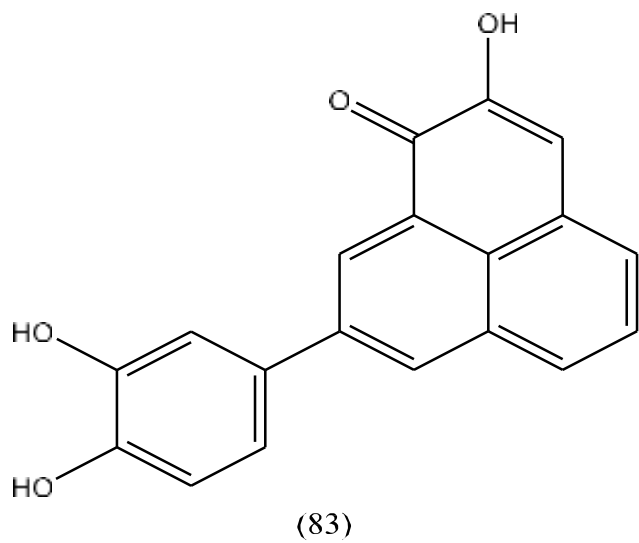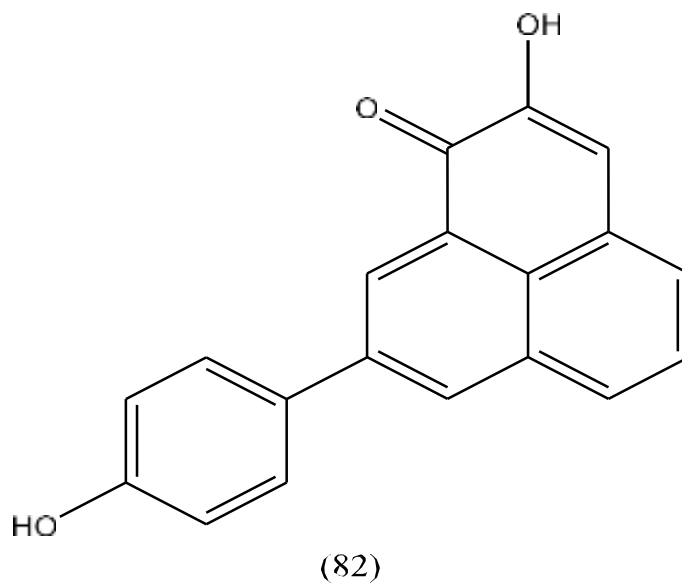

**Supplementary Figure 9S.** Structure of reported phenalene derivates from *E. crassipes*.

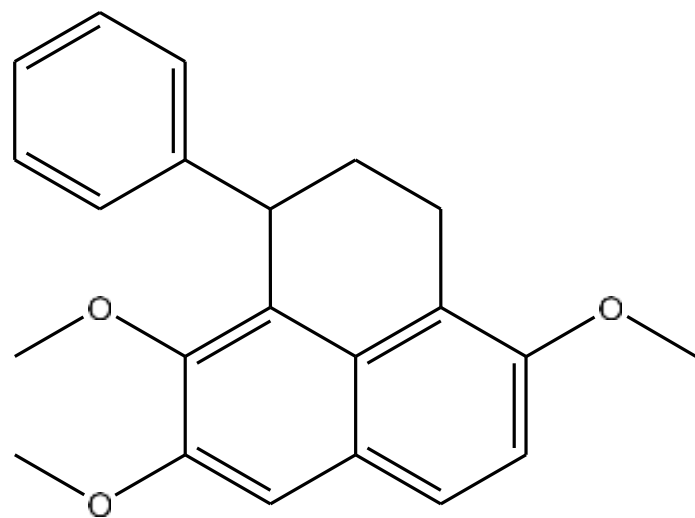

(84)

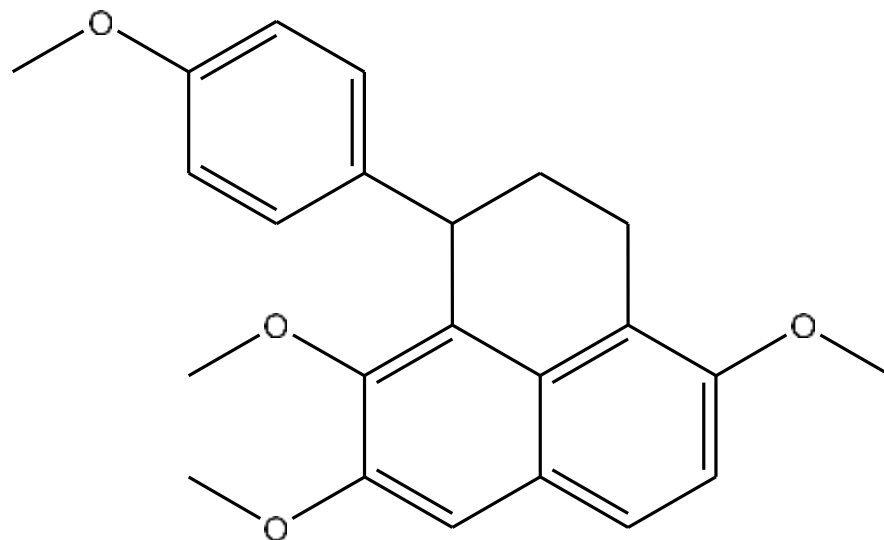

(85)

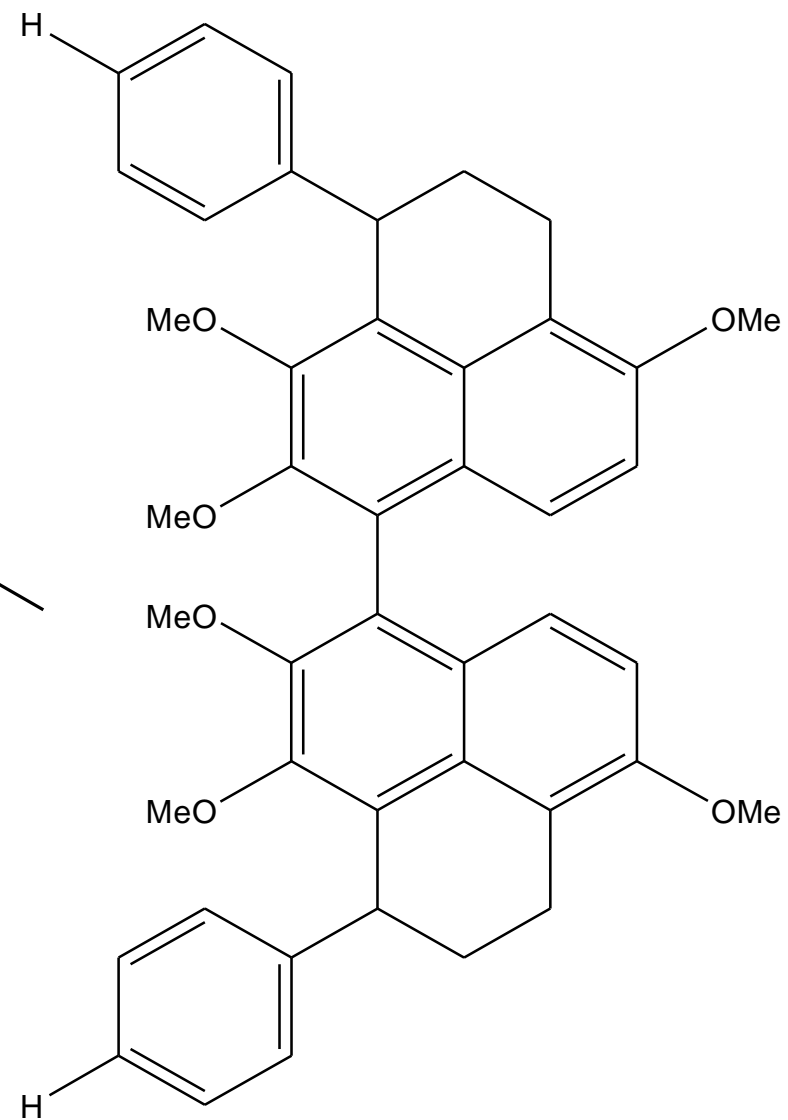

(86)

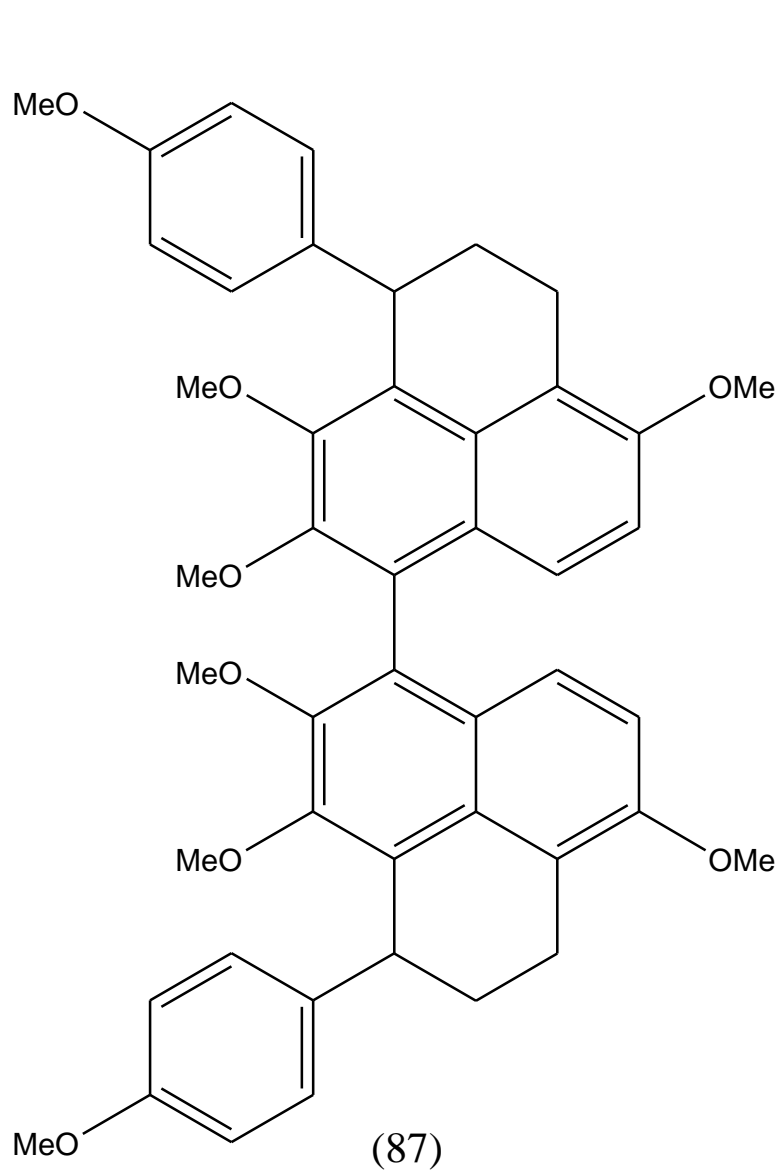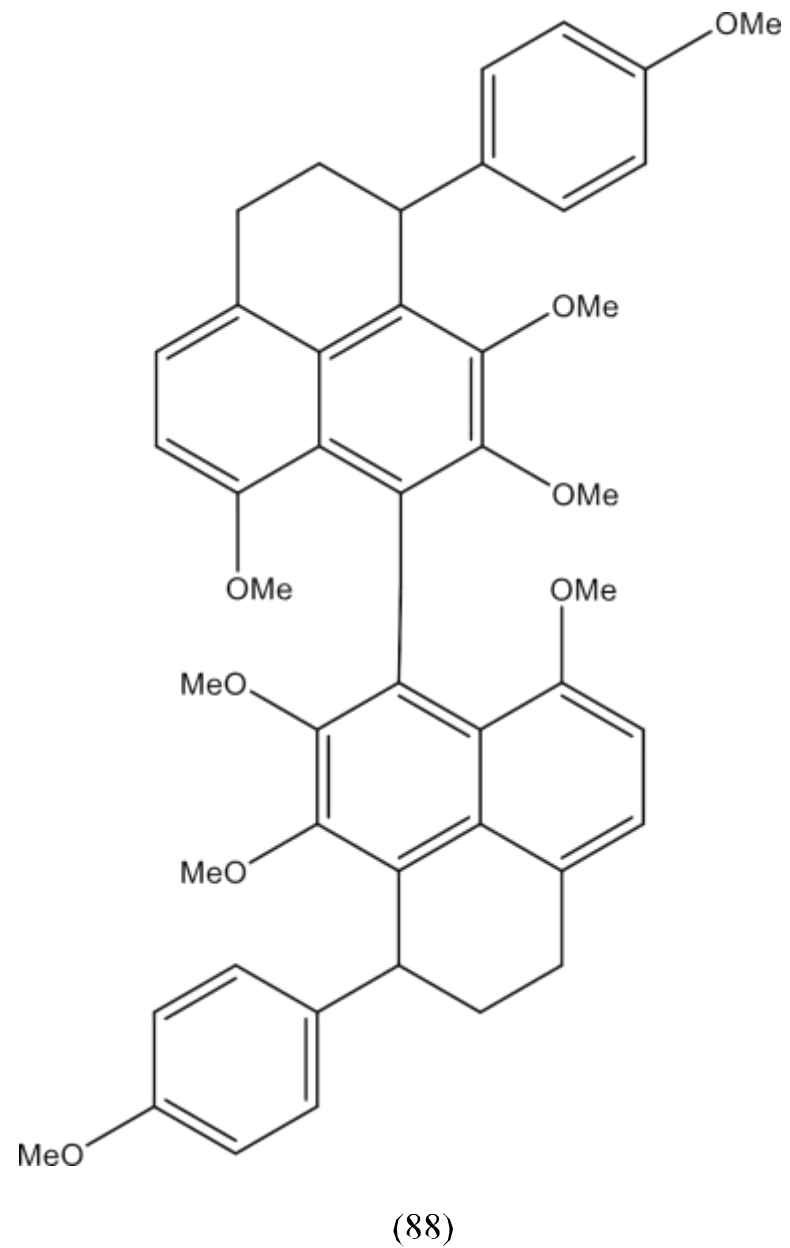

**Supplementary Figure 9S.** *Continued.*

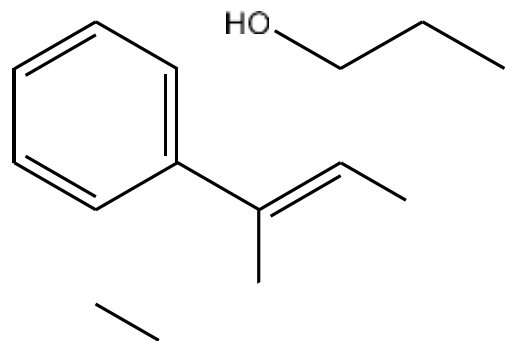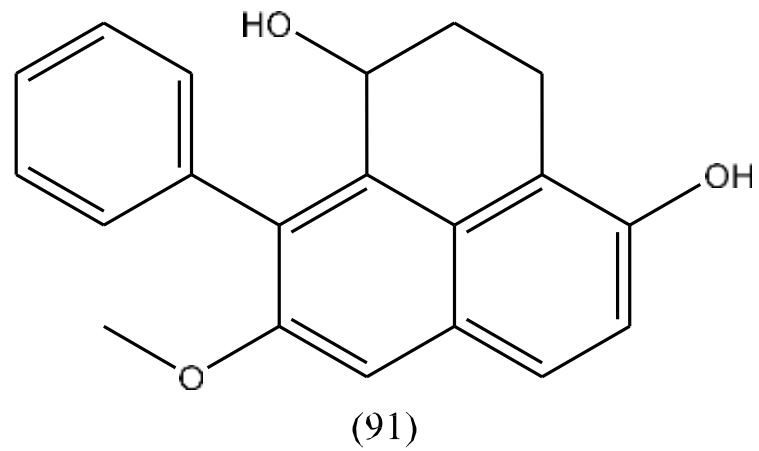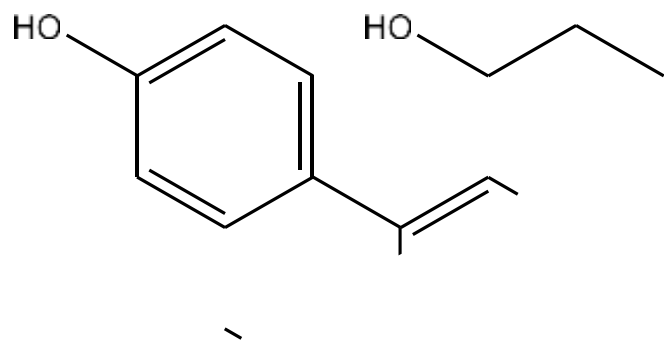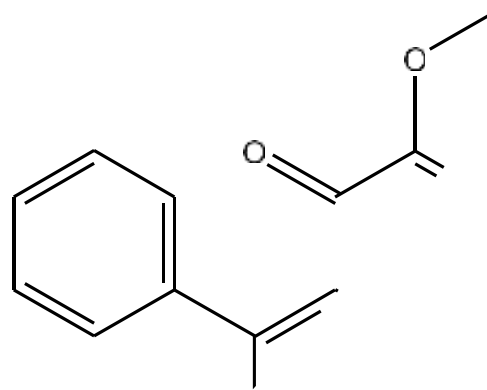

Supplementary Figure 9S. *Continued.*

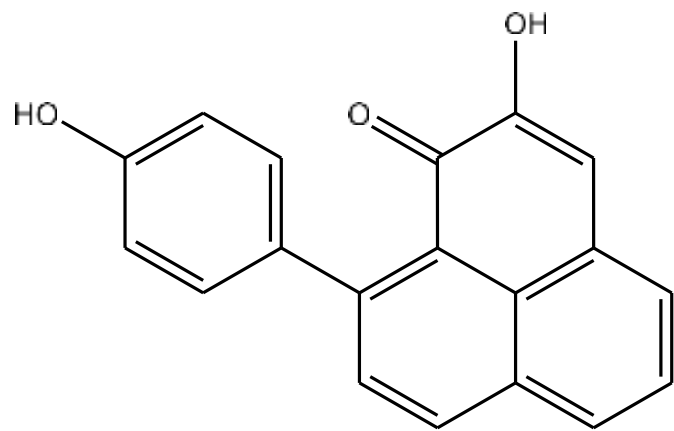

(94)

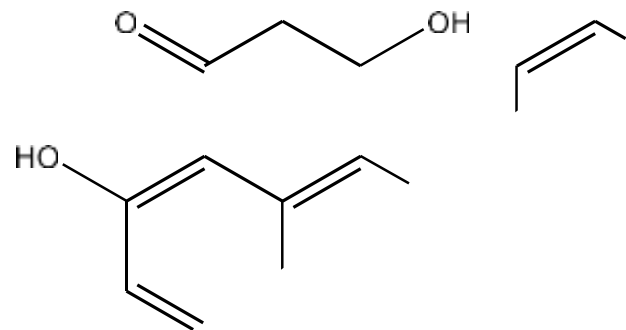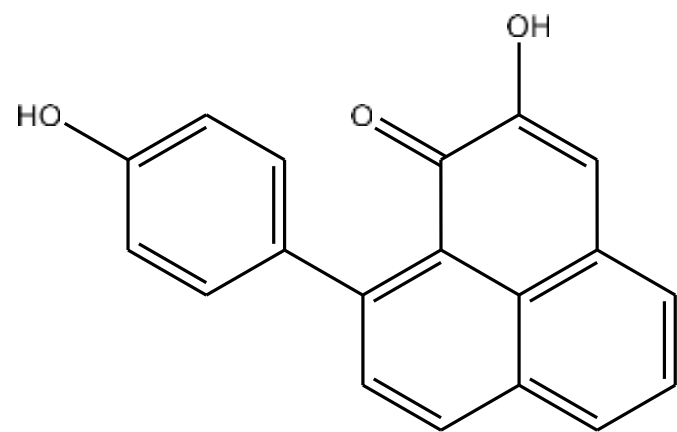

(97)

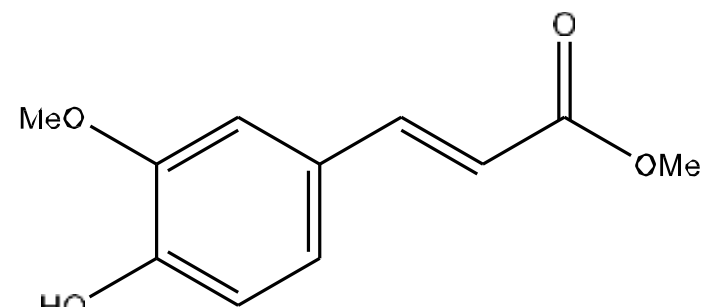

(98)

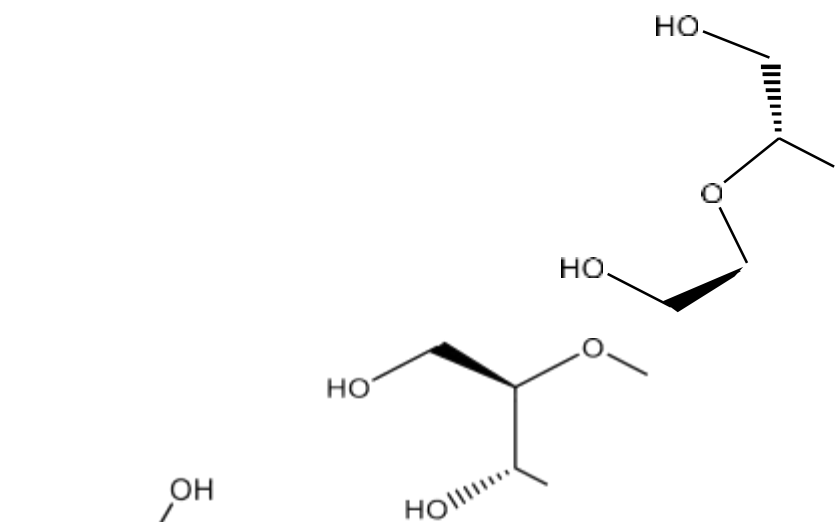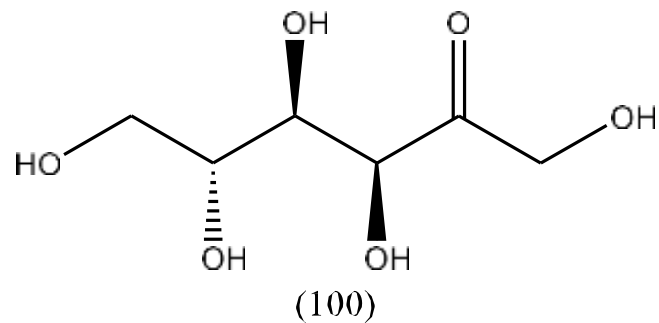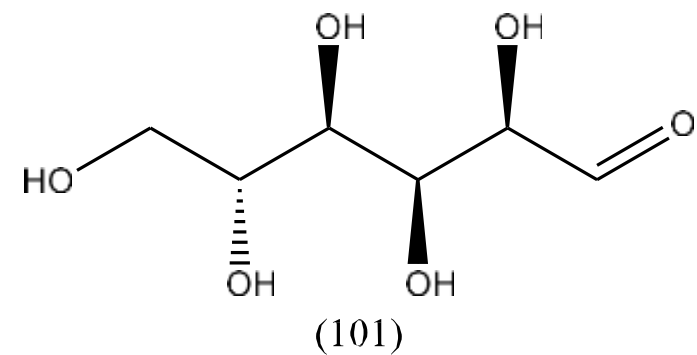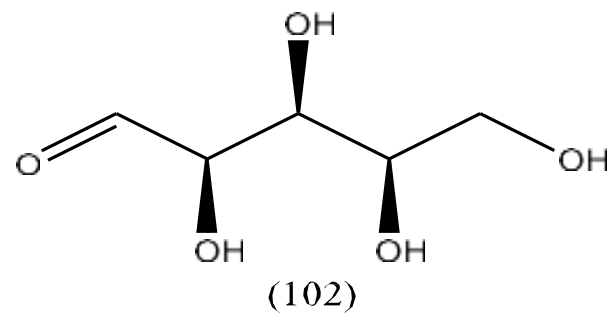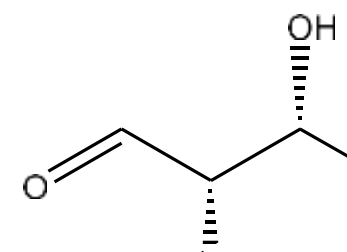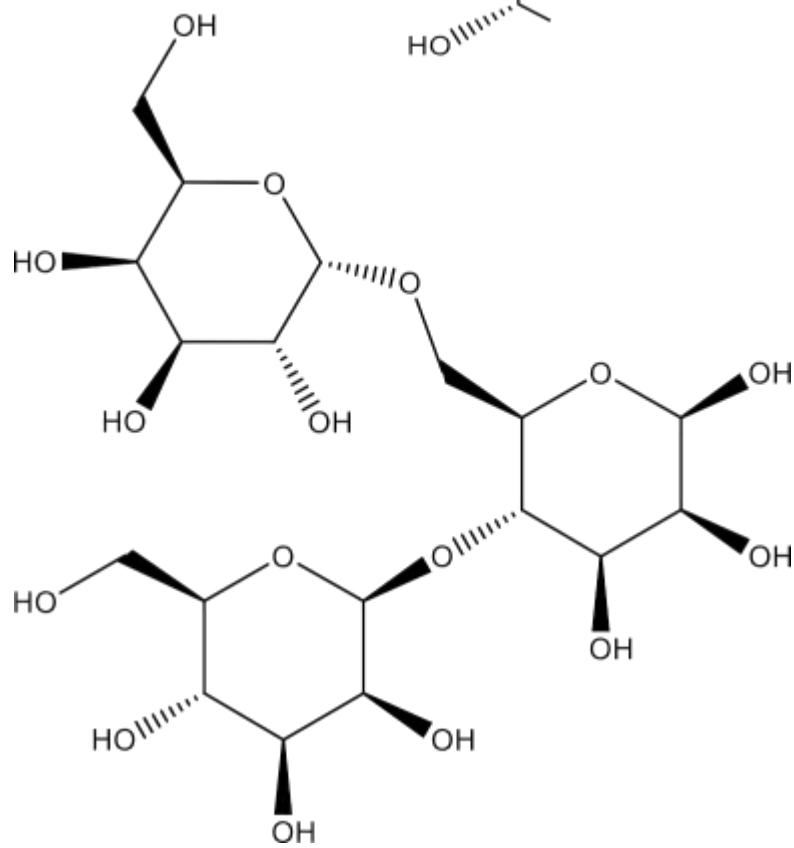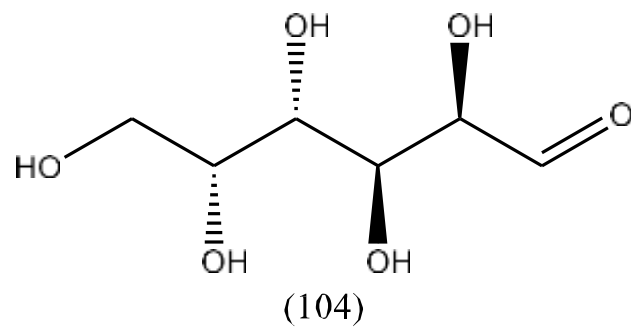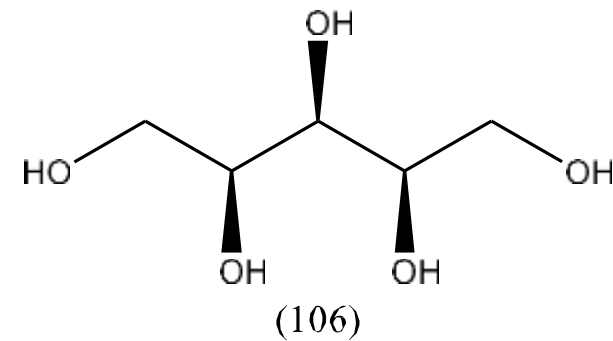

(105)

**Supplementary Figure 10S.** Structure of reported carbohydrates from *E. crassipes*.



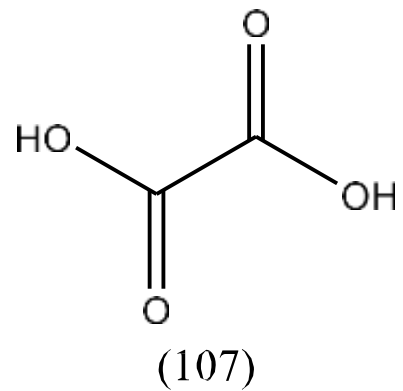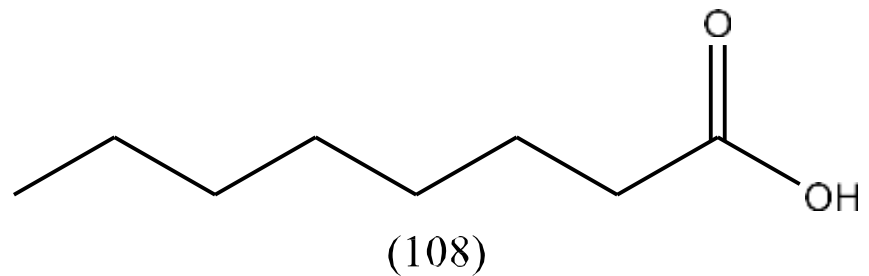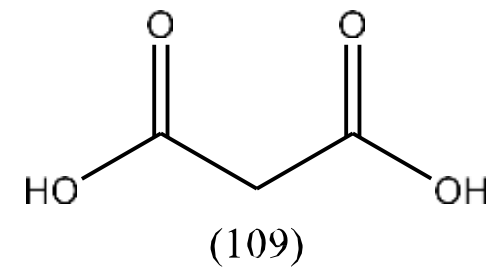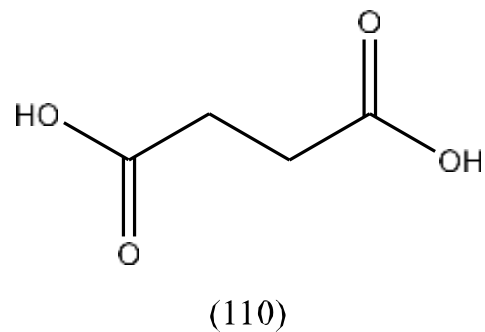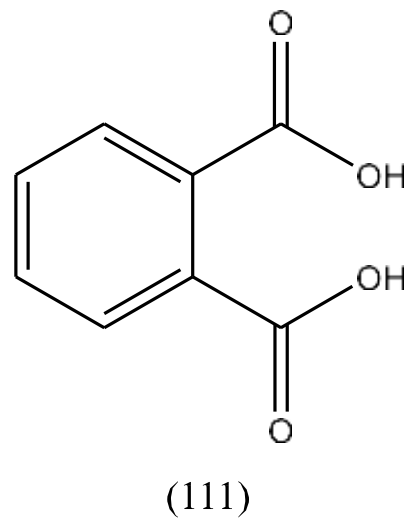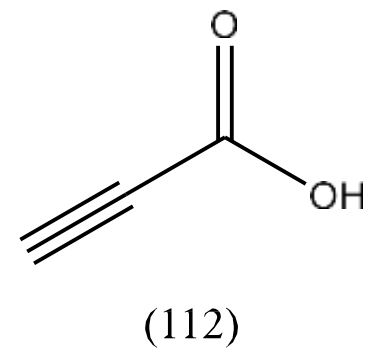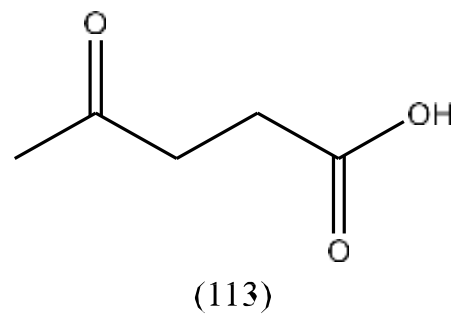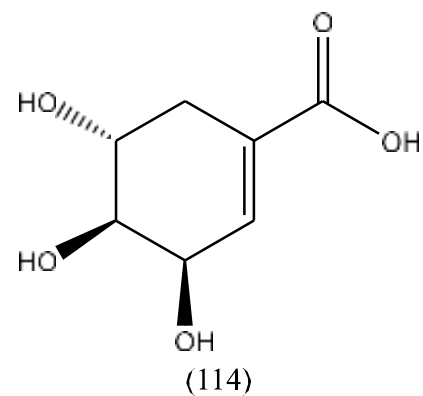

**Supplementary Figure 11S.** Structure of reported organic acids from *E. crassipes*.

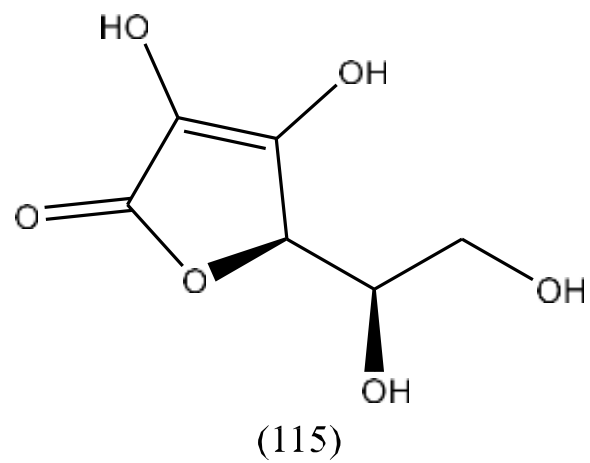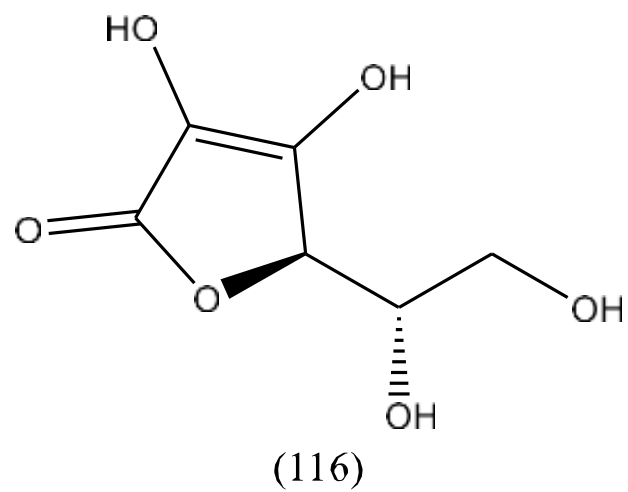

Supplementary Figure 11S. *Continued.*

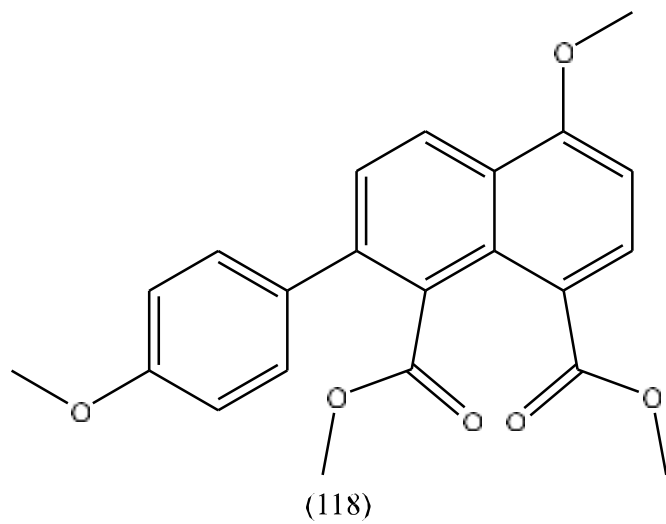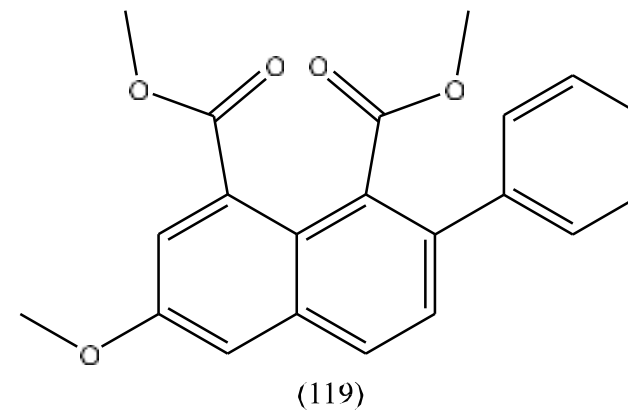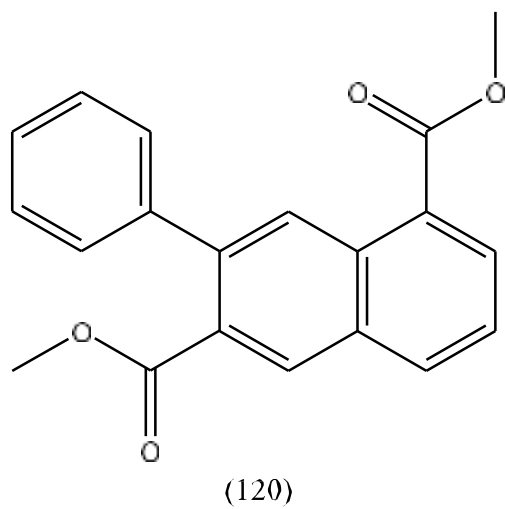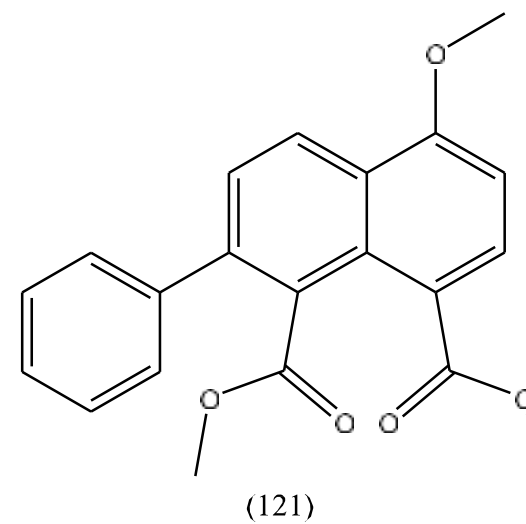

**Supplementary Figure 12S.** Structure of other compounds reported from *E. crassipes*.

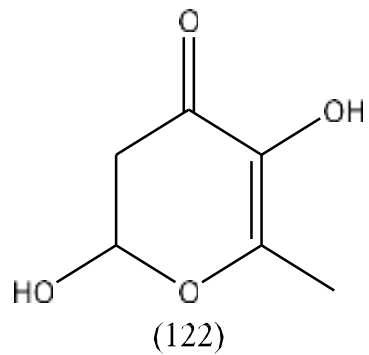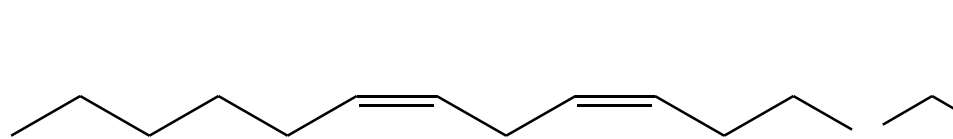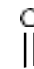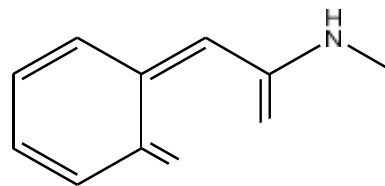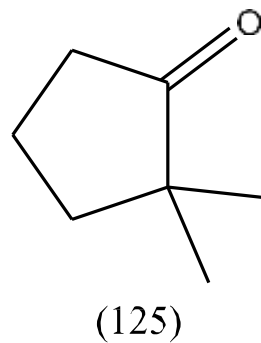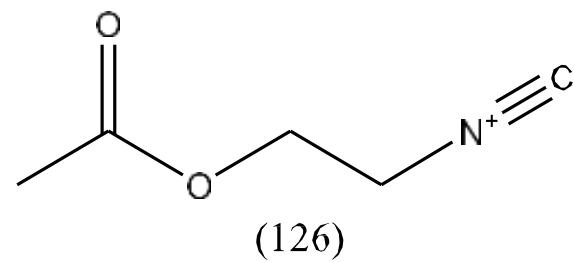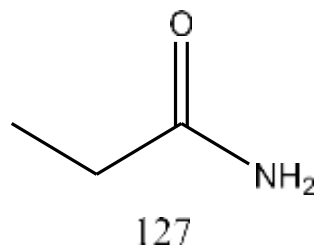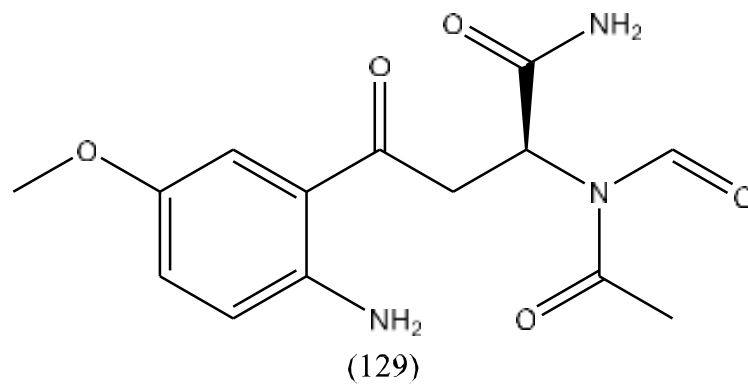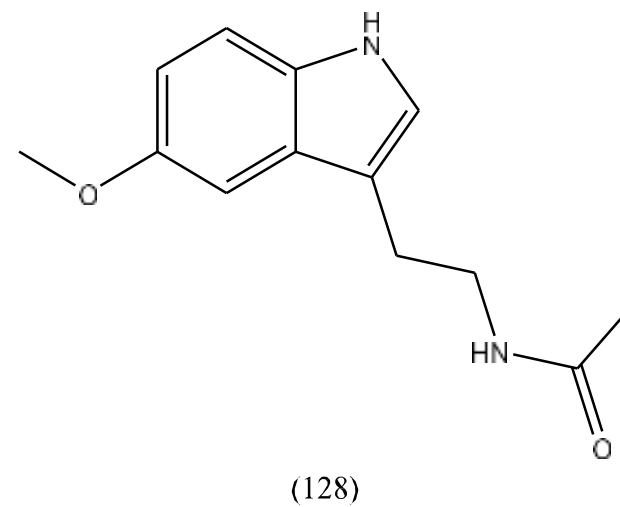

**Supplementary Figure 12S.** Structure of other compounds reported from *E. crassipes*.

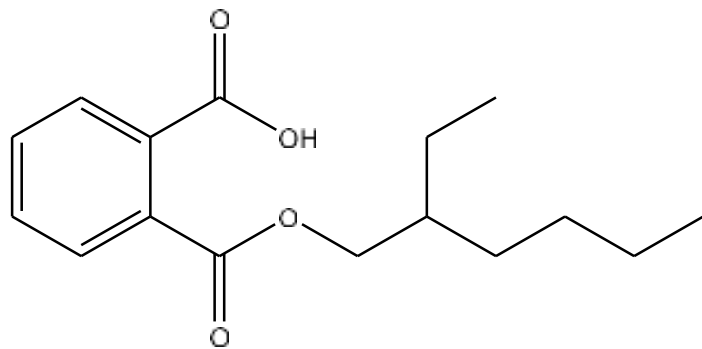

(130)

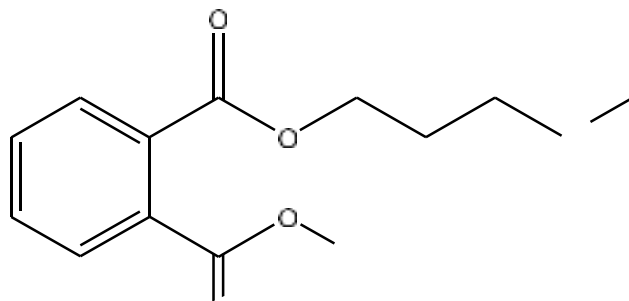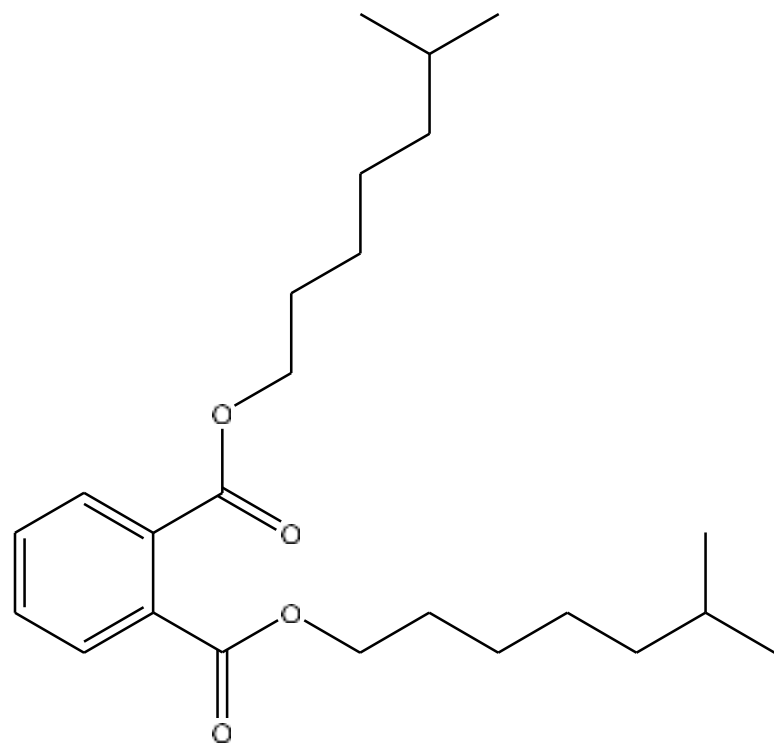

(132)

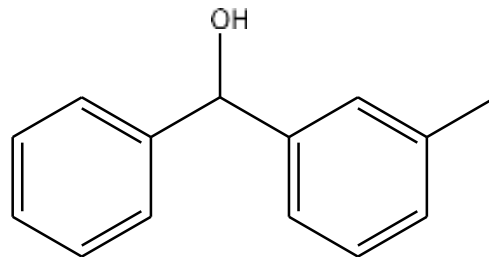

(133)

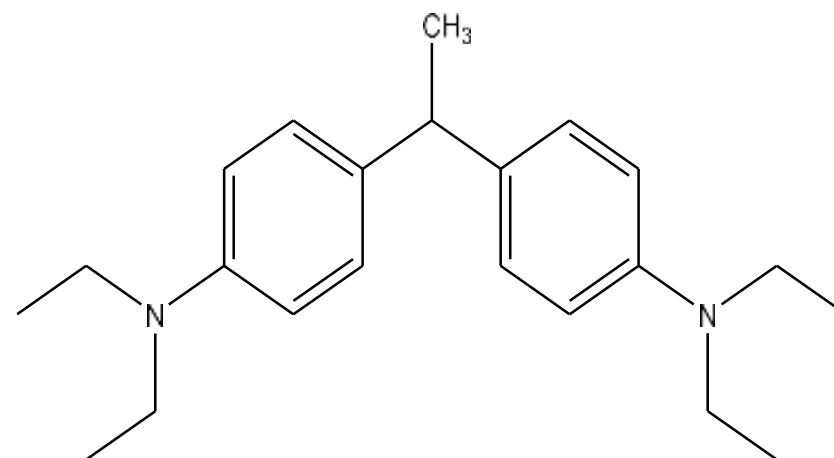

(134)

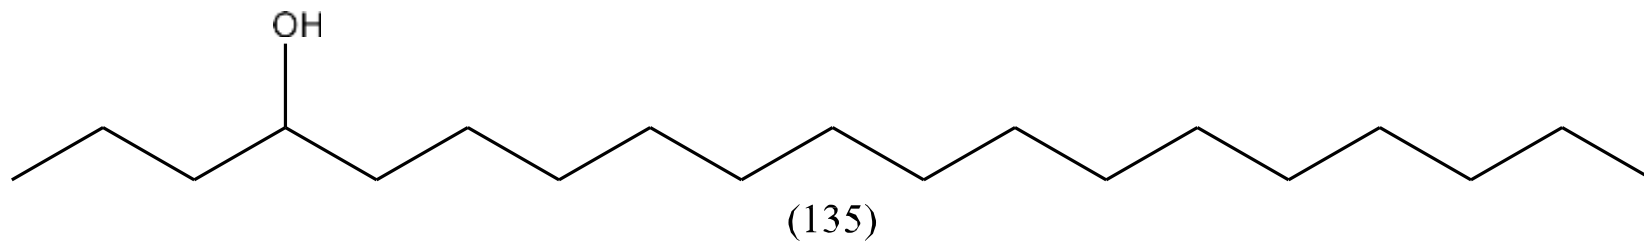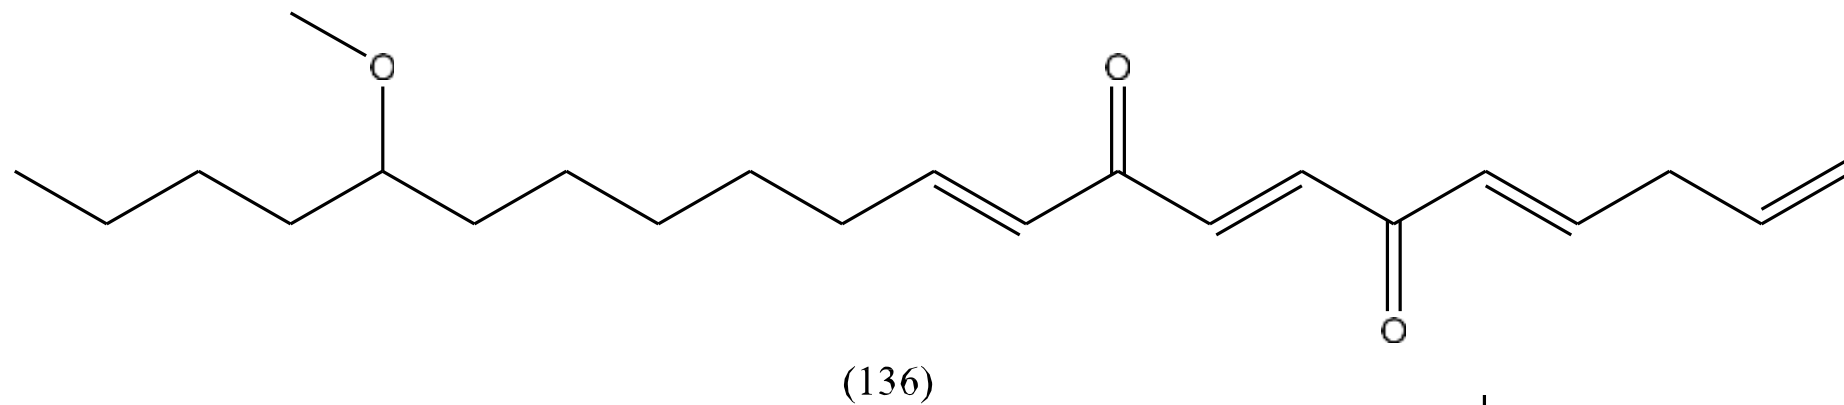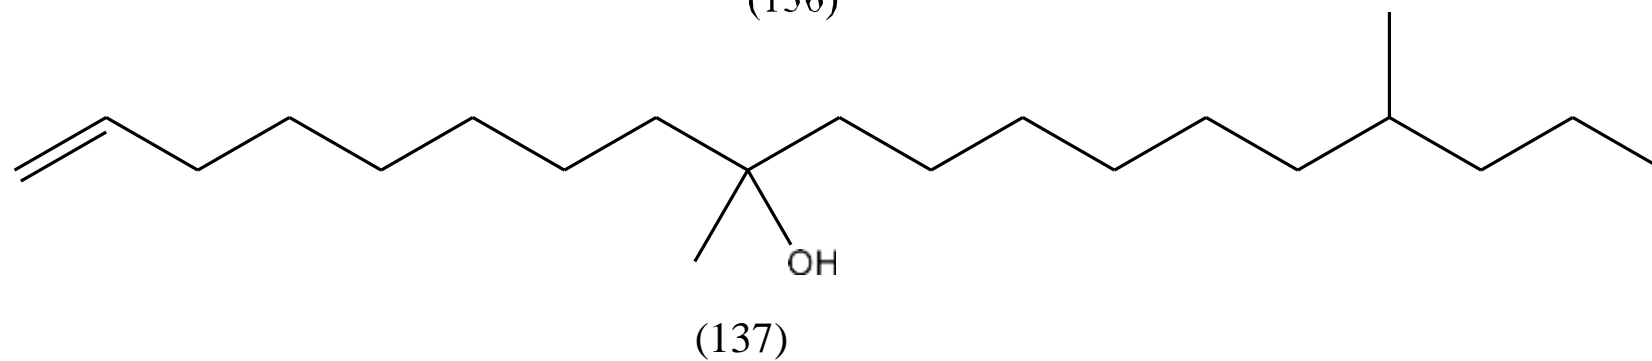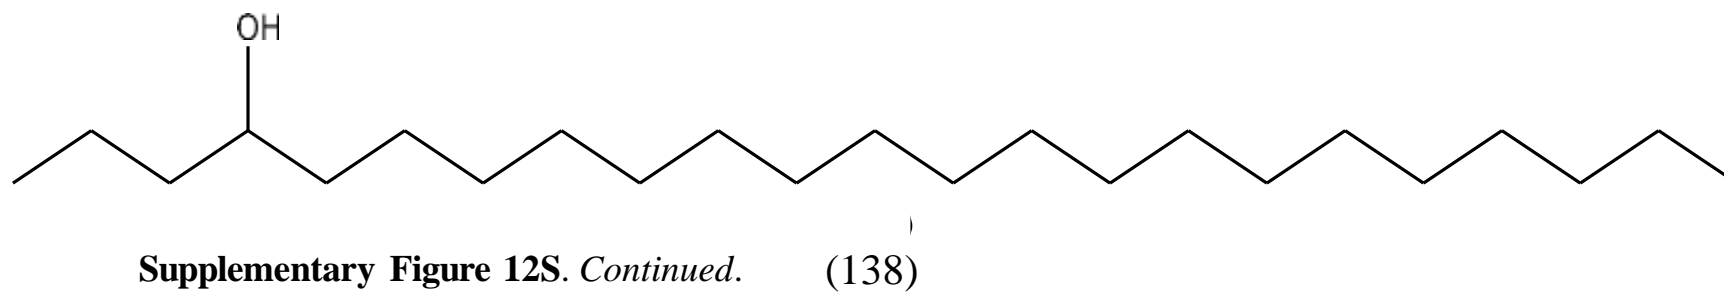

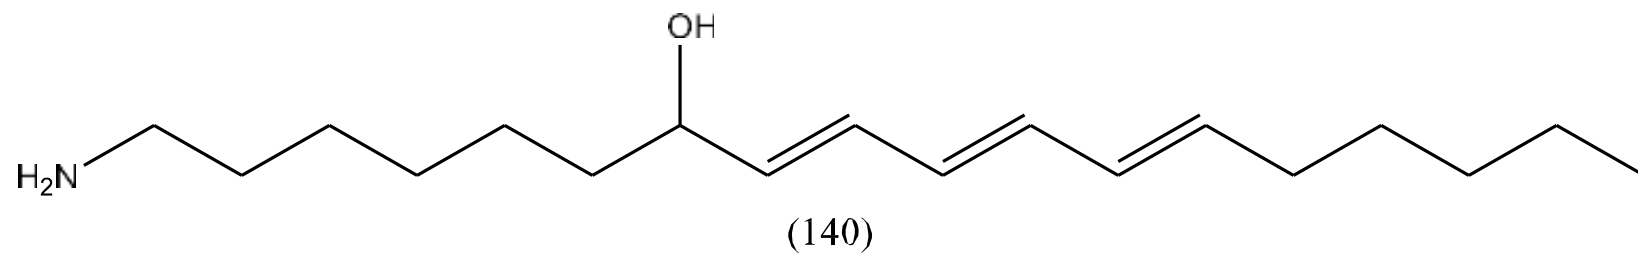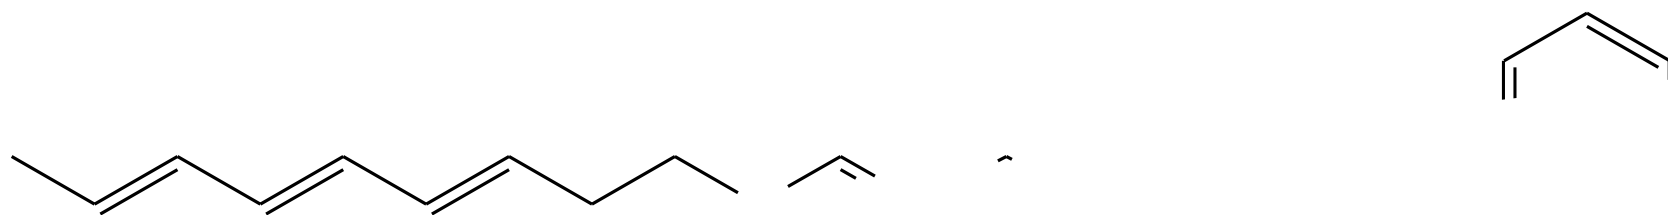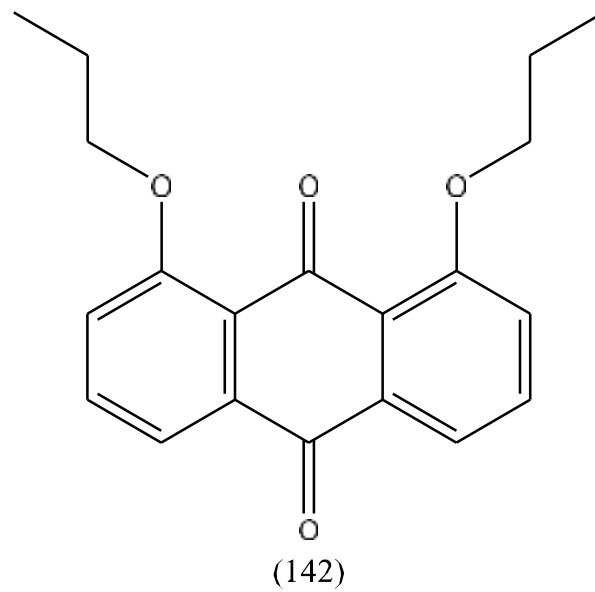

**Supplementary Figure 12S.** *Continued.*

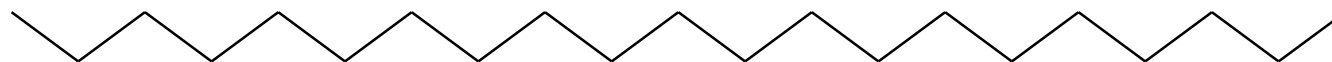

(145)

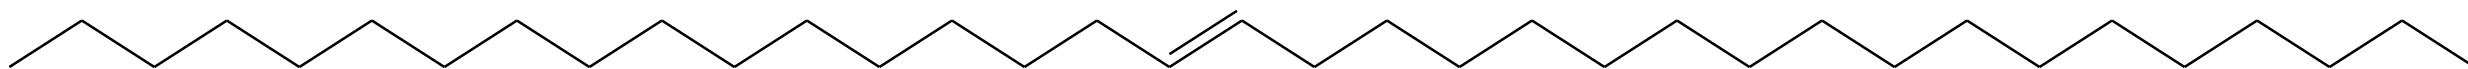

(146)

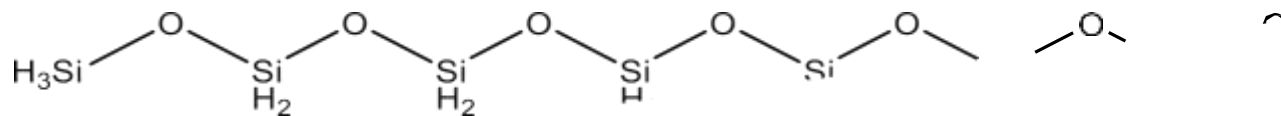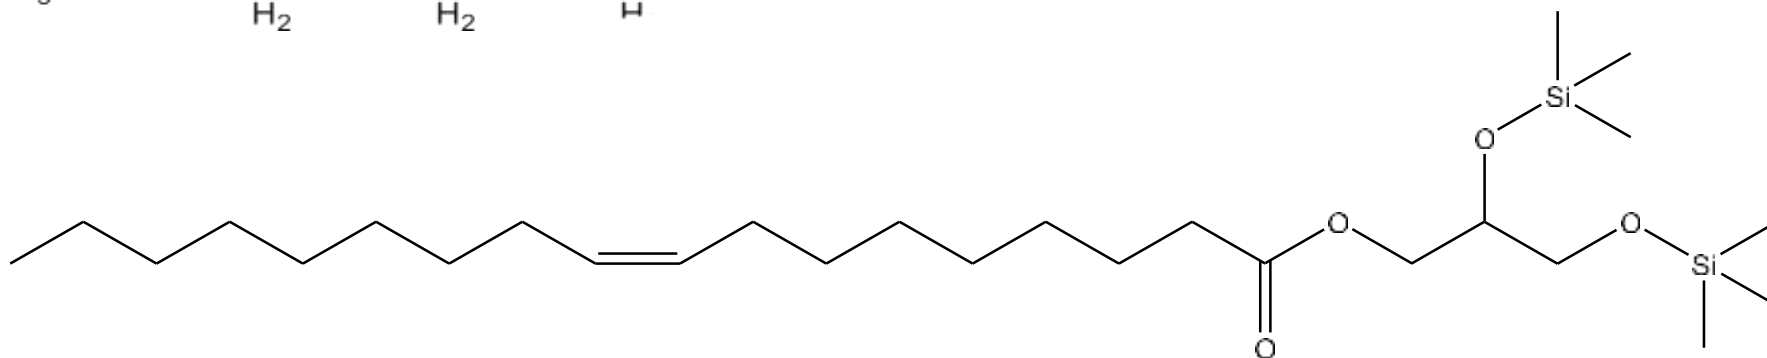

(148)



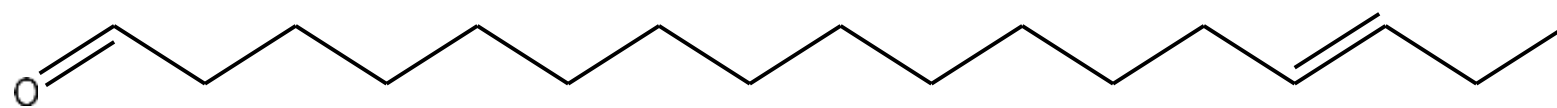

(149)

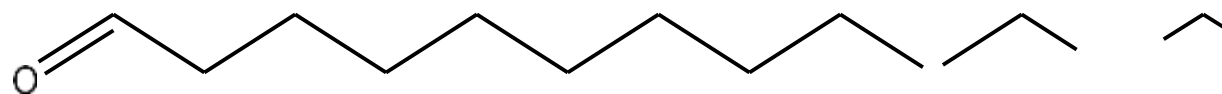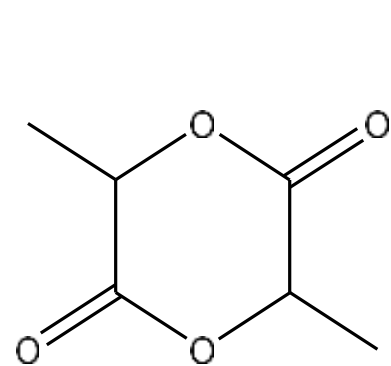

(152)

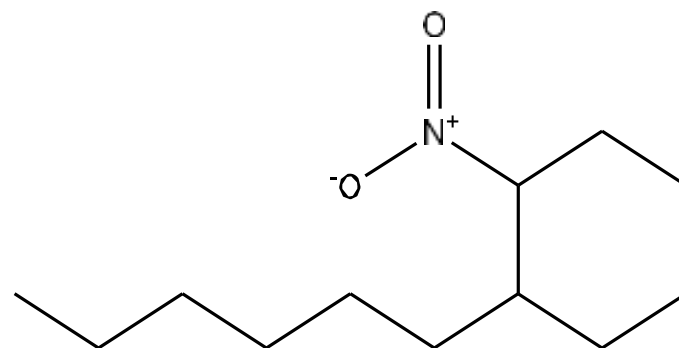

(153)

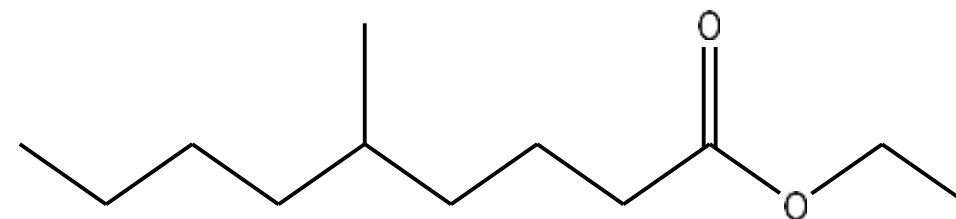

(154)
